# Supplementary material for: Identification of a radiosensitivity signature using integrative metaanalysis of published microarray data for NCI-60 cancer cells
Source: PubMed Central journal article supplement (PMC3472294; doi:10.1186/1471-2164-13-348), 2012-07-30

**PTPRC : Corr = -0.671**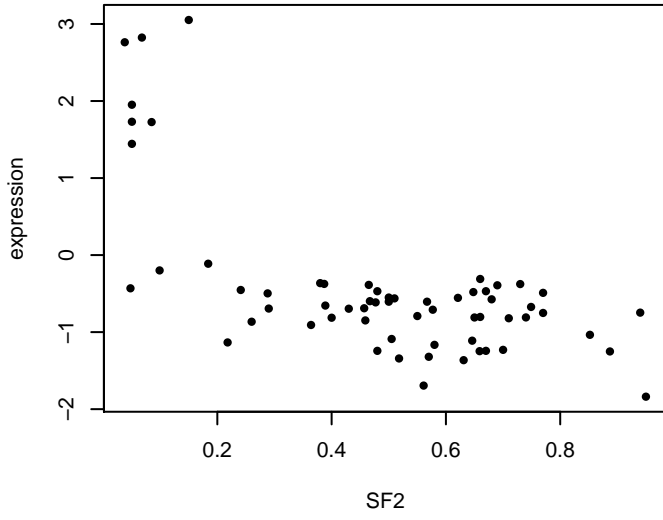**HCLS1 : Corr = -0.624**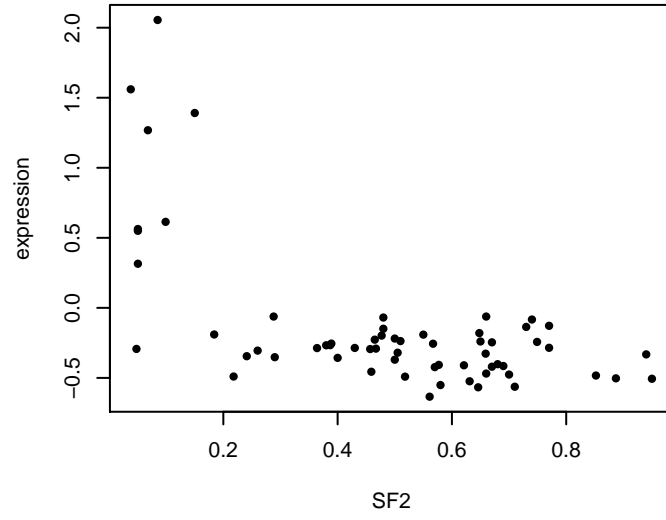**MYB : Corr = -0.545**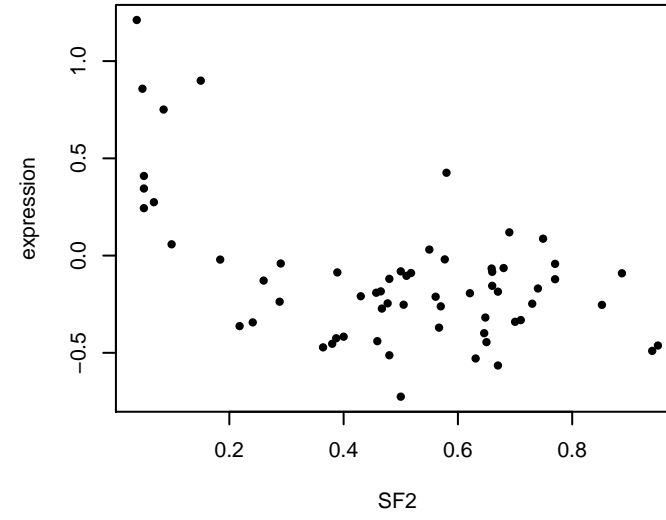**ARHGDI1B : Corr = -0.48**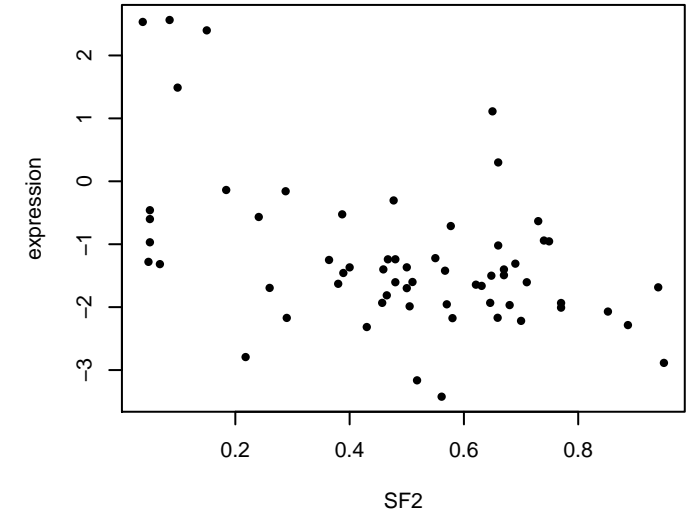**LAPTM5 : Corr = -0.455**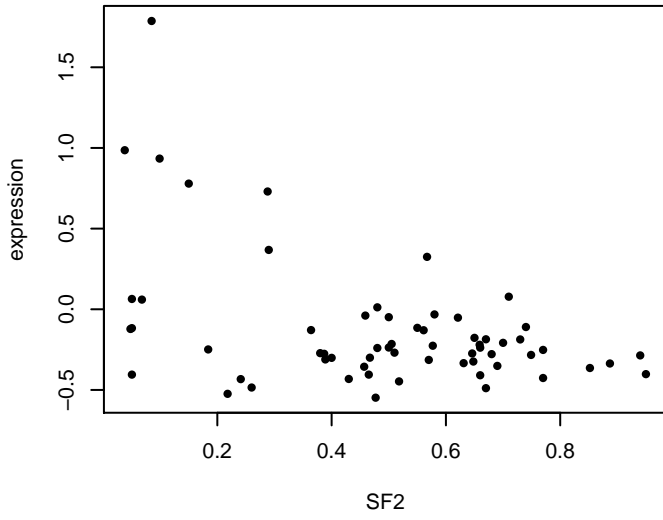**WAS : Corr = -0.455**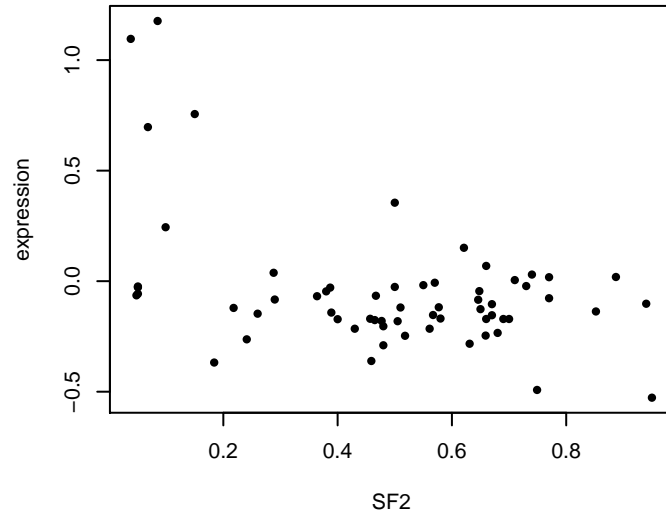**CXCR4 : Corr = -0.449**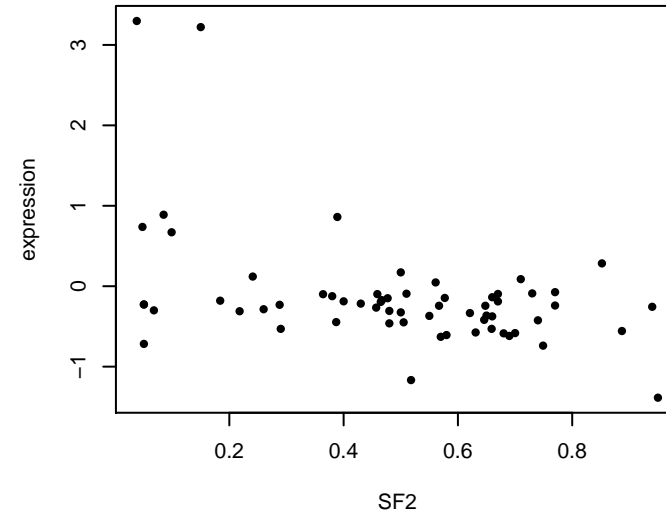**LRMP : Corr = -0.43**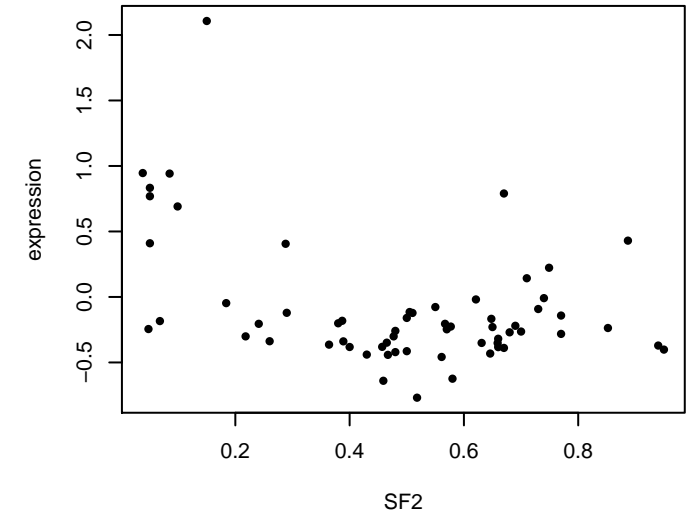**CORO1A : Corr = -0.326**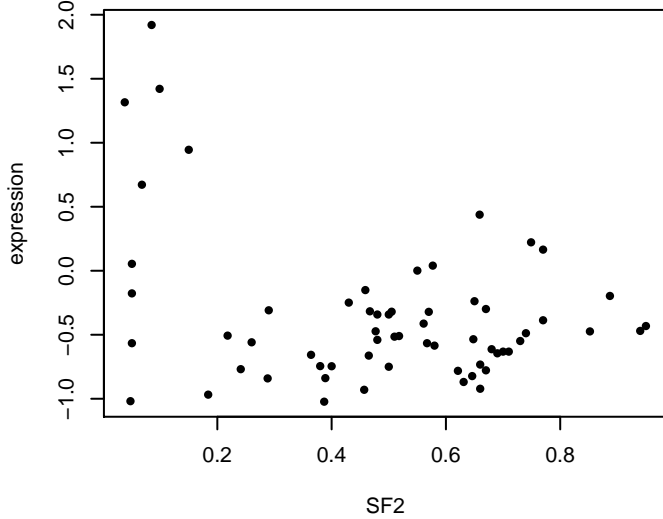**PTPRCAP : Corr = -0.321**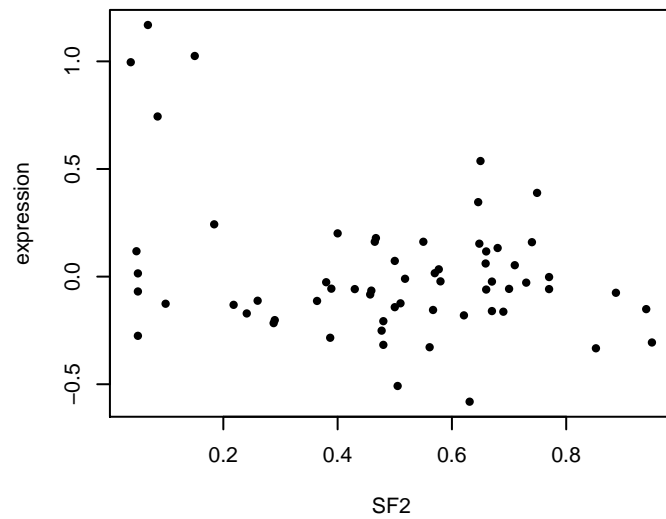**PKM2 : Corr = 0.263**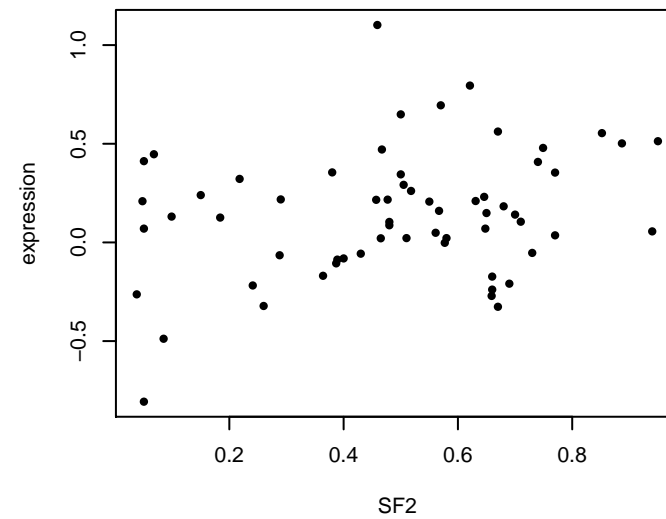**ACTN1 : Corr = 0.339**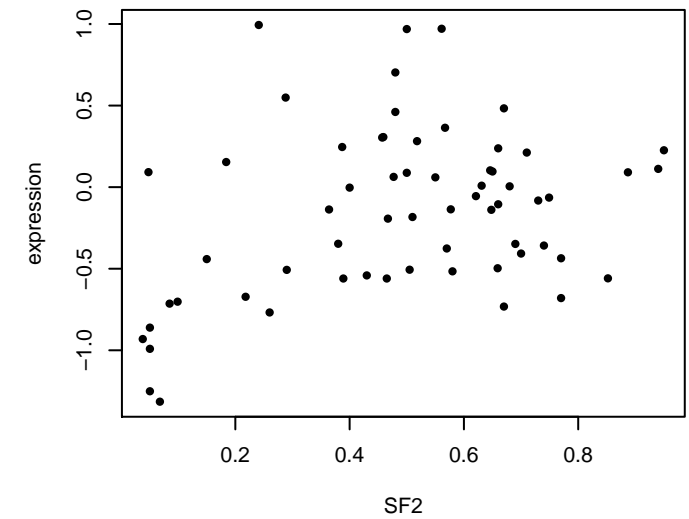

**ANXA2 : Corr = 0.363**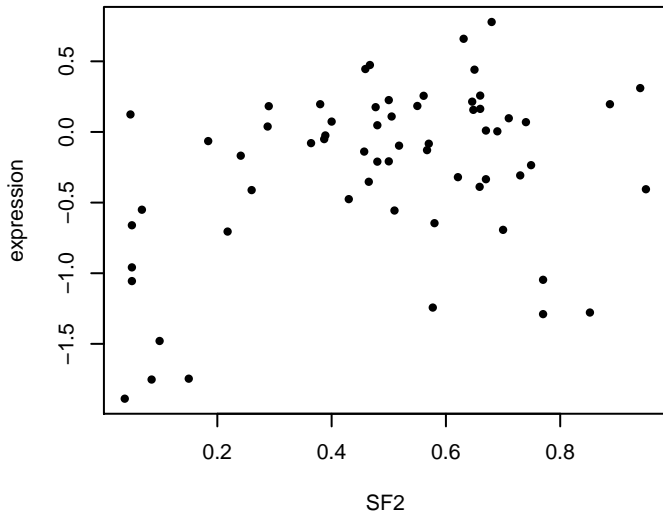**EMP2 : Corr = 0.371**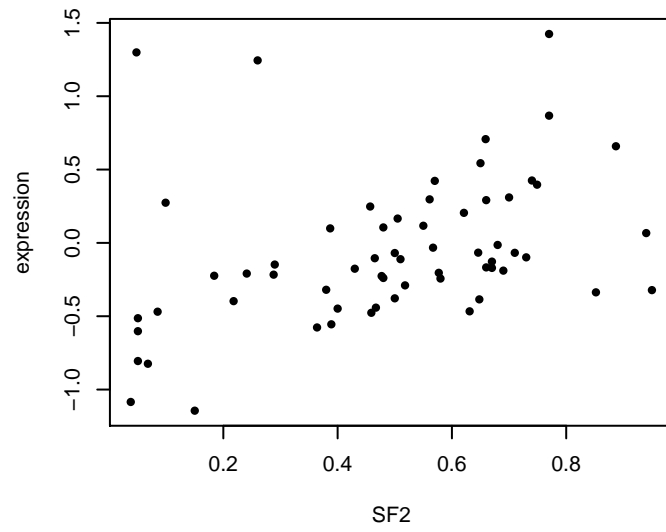**PYGB : Corr = 0.381**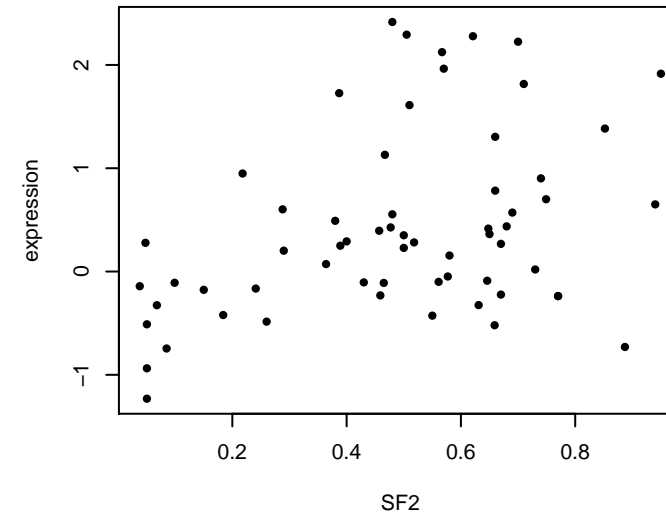**RAB13 : Corr = 0.384**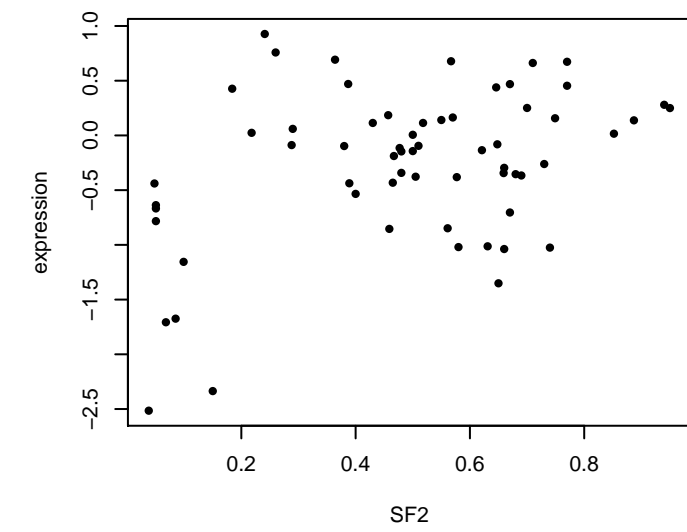

1

**CD63 : Corr = 0.388**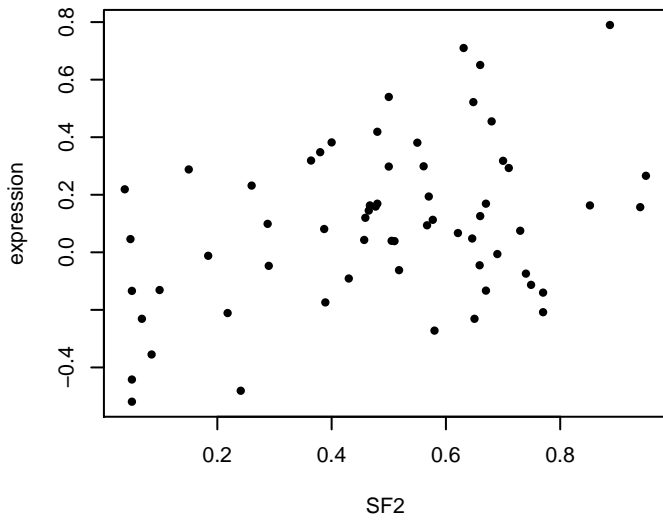**PIR : Corr = 0.399**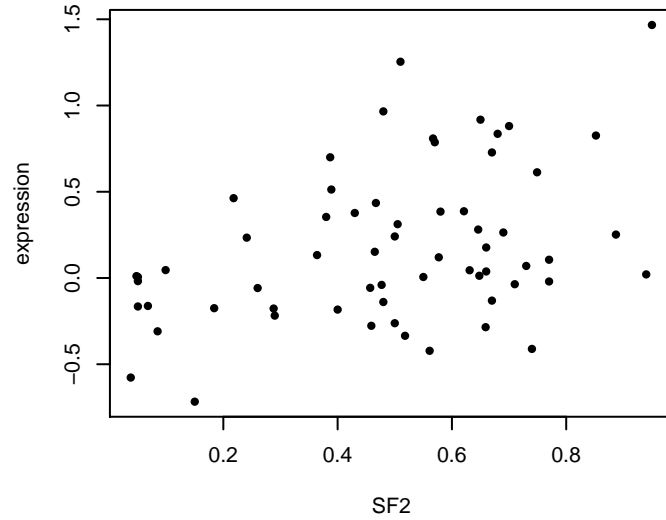**CAPNS1 : Corr = 0.406**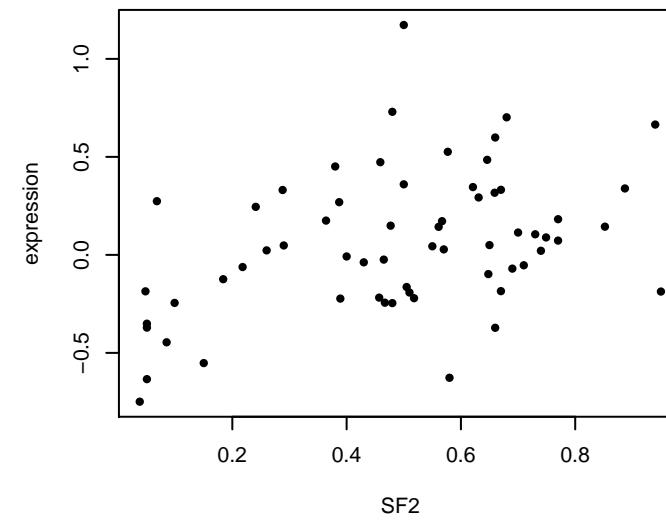**PTMS : Corr = 0.416**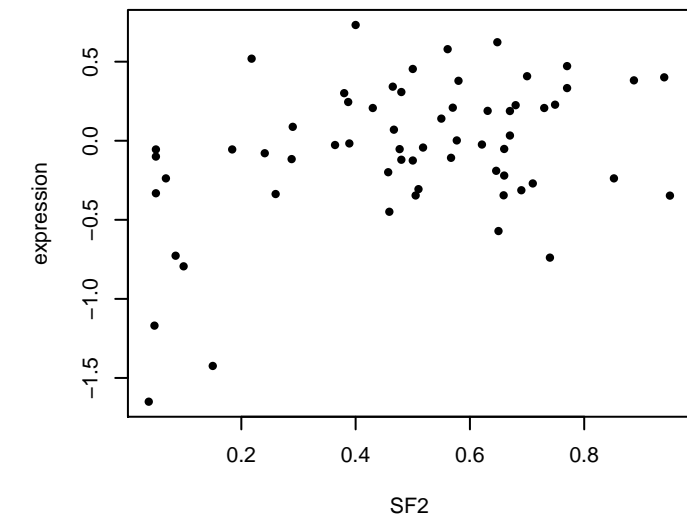**CCND1 : Corr = 0.42**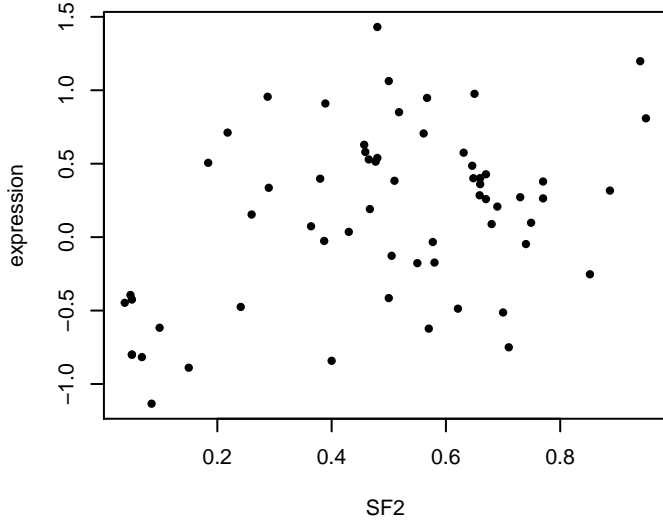**SCRN1 : Corr = 0.448**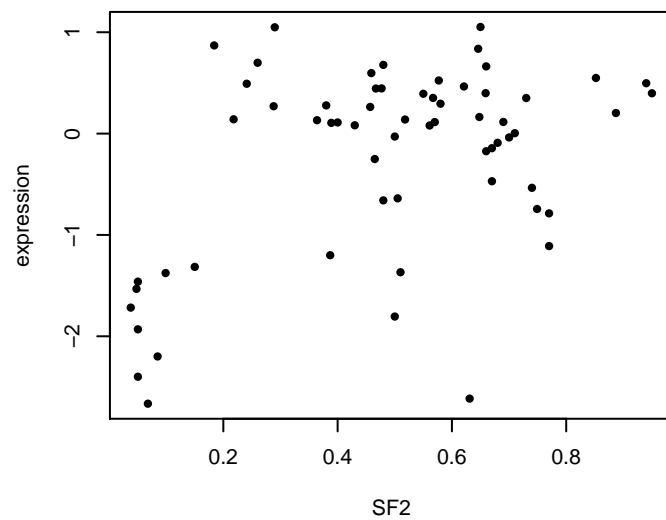**CBR1 : Corr = 0.451**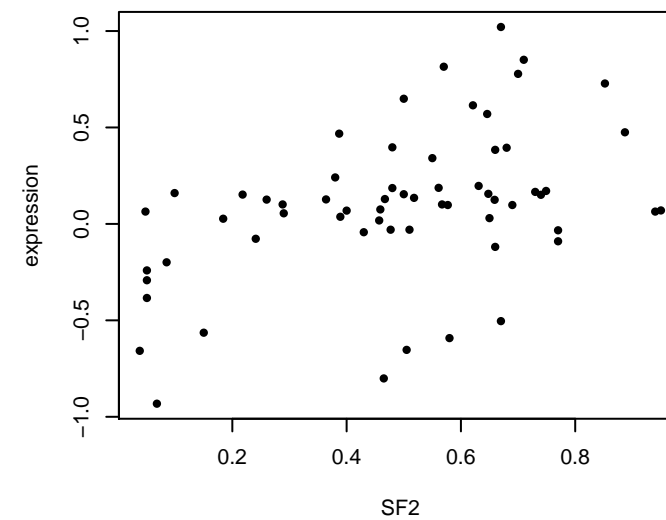**ANXA5 : Corr = 0.459**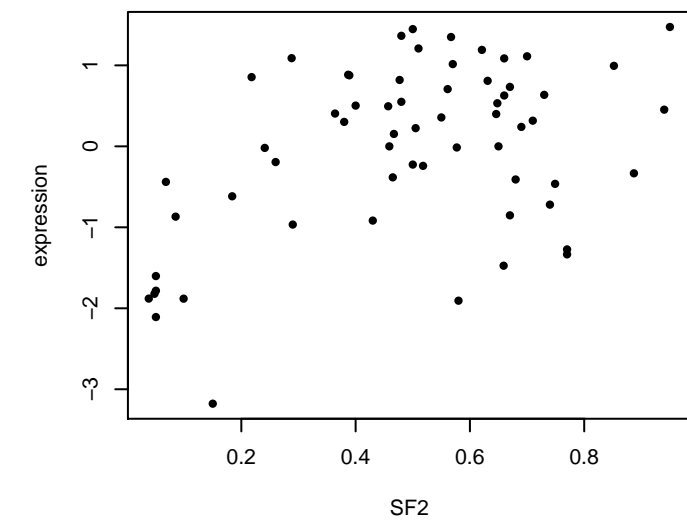

**ITGB5 : Corr = 0.473**

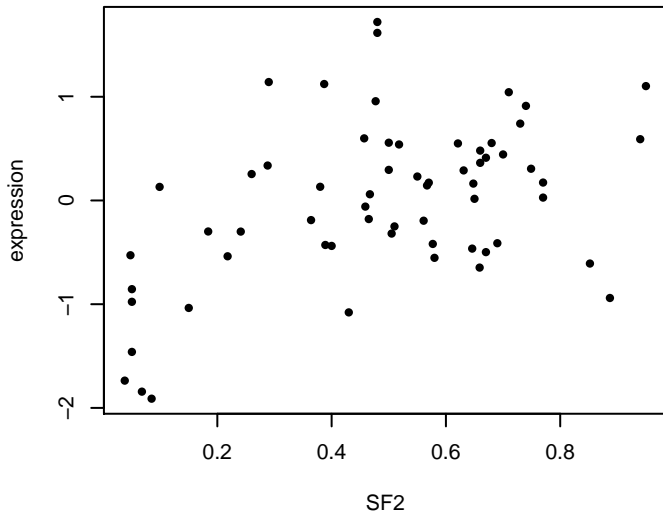

**HTRA1 : Corr = 0.518**

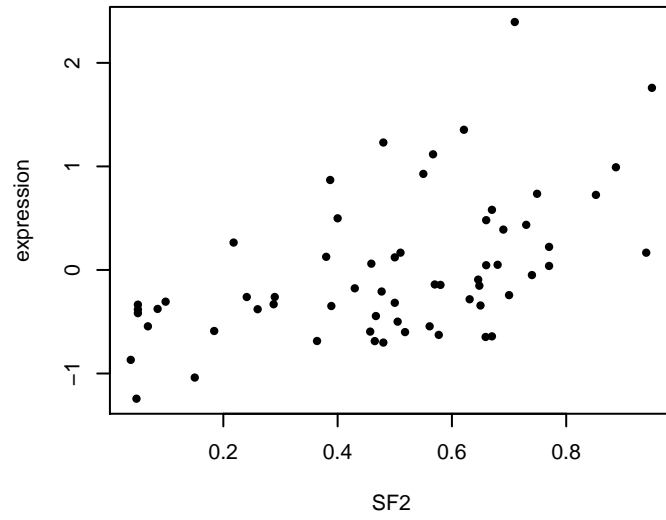

**RALB : Corr = 0.546**

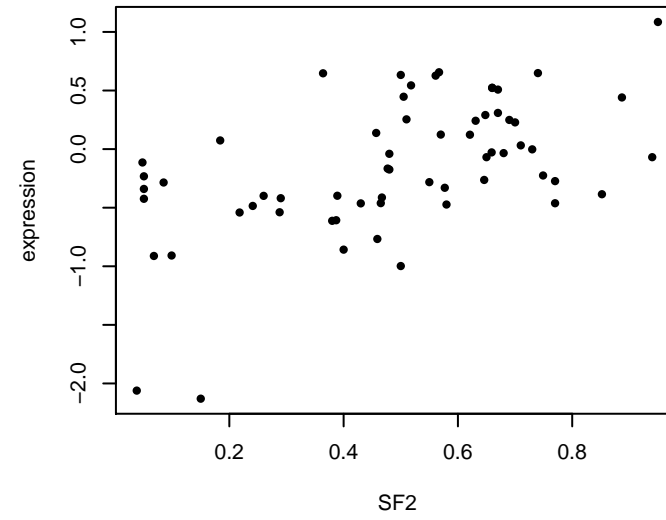

**DAG1 : Corr = 0.559**

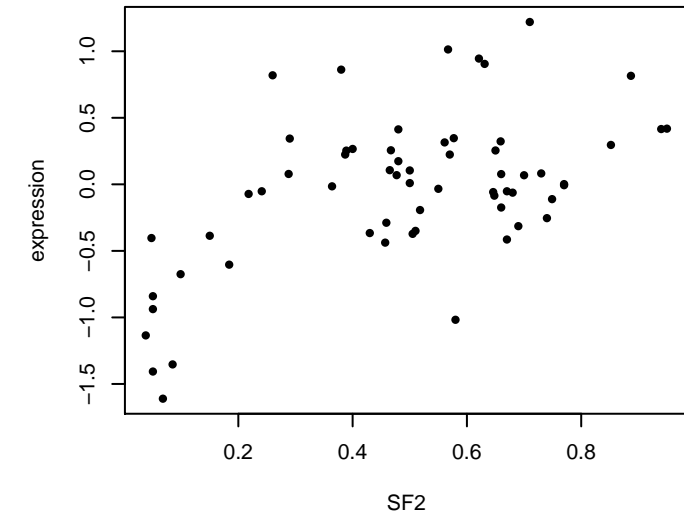

**SQSTM1 : Corr = 0.603**

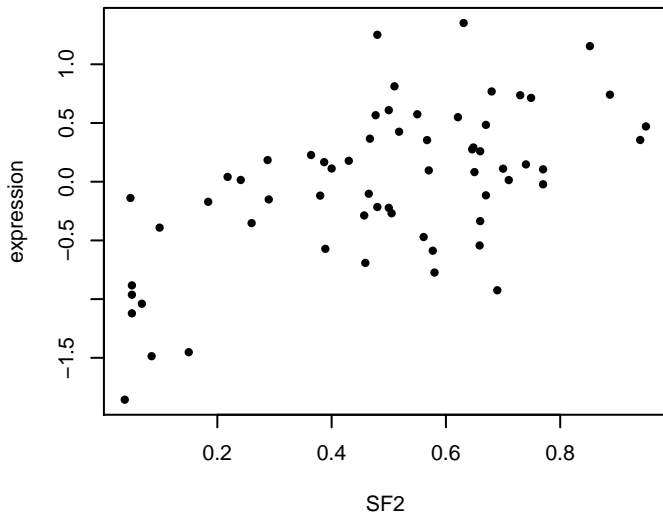

**PFN2 : Corr = 0.626**

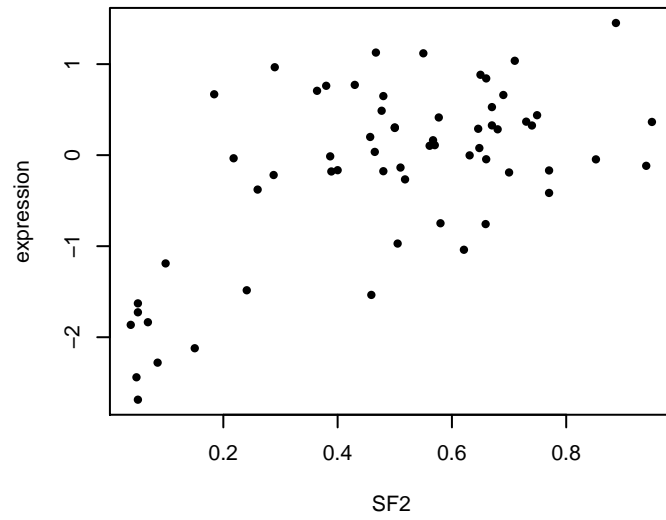

**TWF1 : Corr = 0.63**

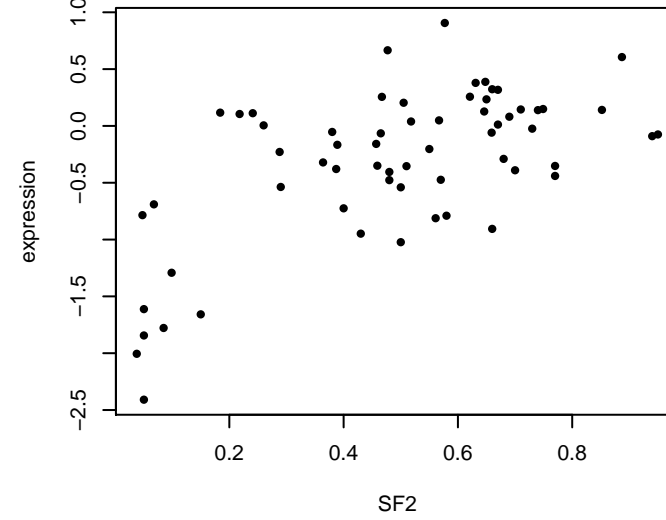

Supplement: 1471-2164-13-348-S2.pdf [file 1471-2164-13-348-S2.pdf]
