# Supplementary material for: Identification of a radiosensitivity signature using integrative metaanalysis of published microarray data for NCI-60 cancer cells
Source: PubMed Central journal article supplement (PMC3472294; doi:10.1186/1471-2164-13-348), 2012-07-30

**MYB : Corr = -0.557**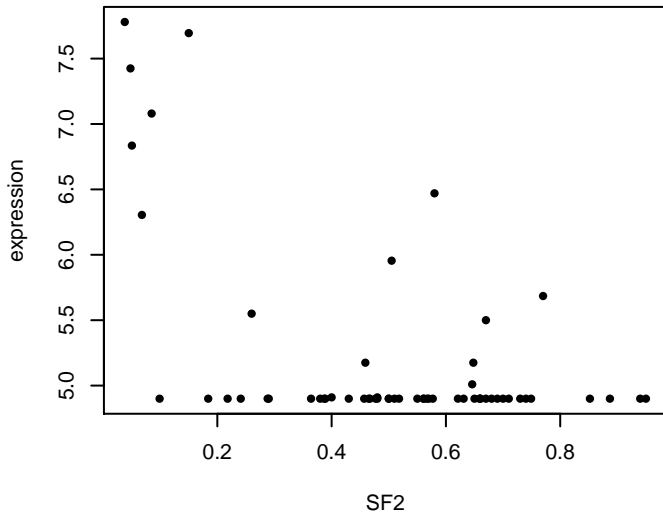**ARHGDI3 : Corr = -0.541**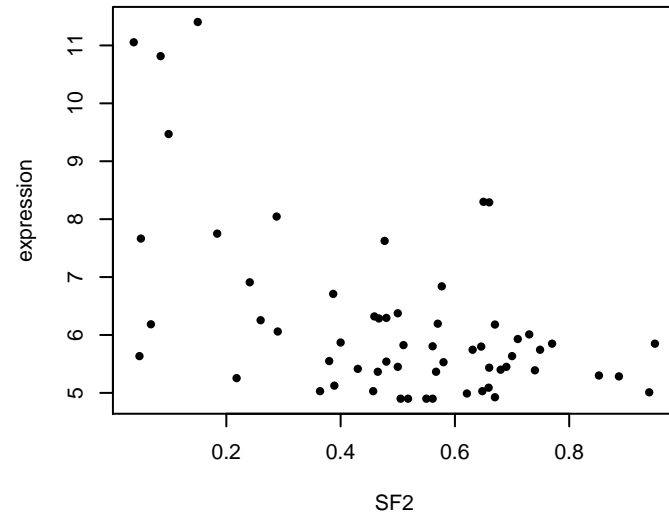**PTPRC : Corr = -0.509**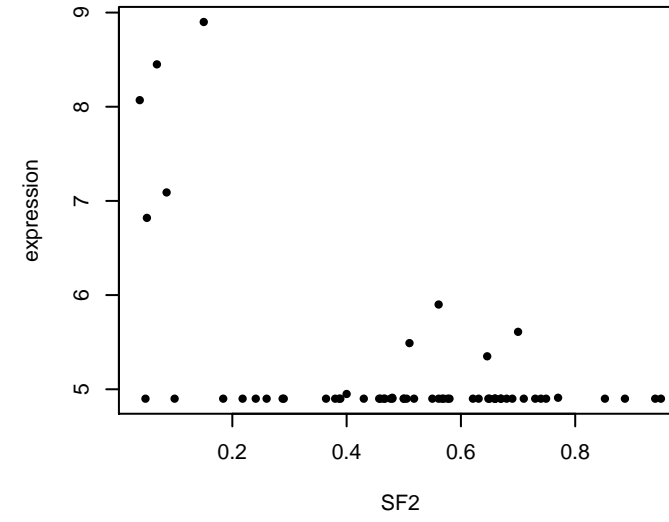**HCLS1 : Corr = -0.5**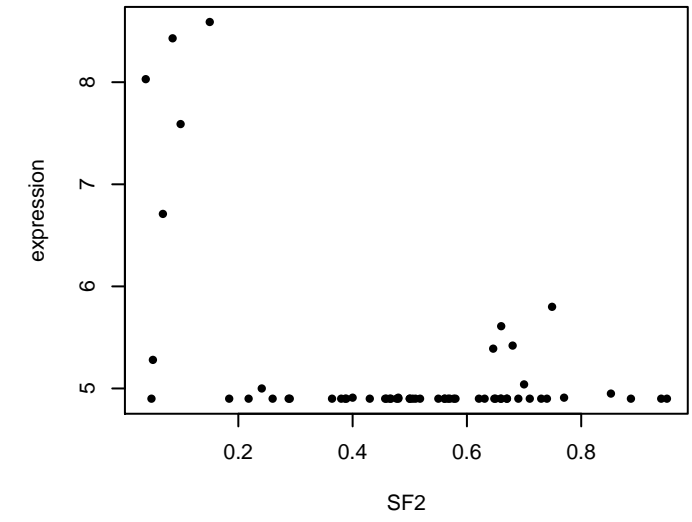**CORO1A : Corr = -0.497**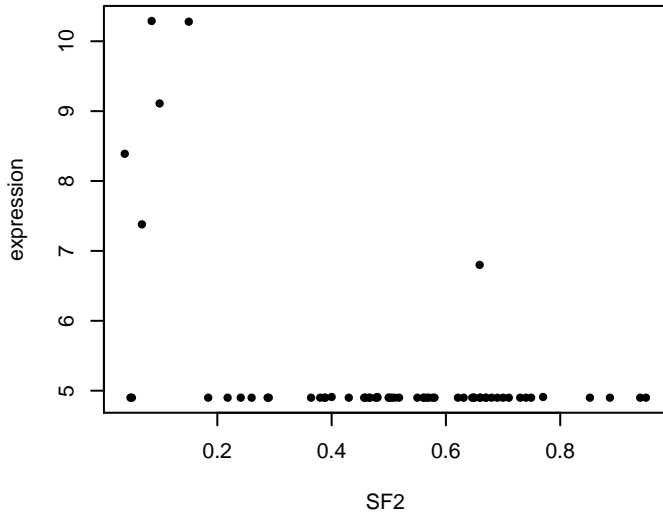**LRMP : Corr = -0.49**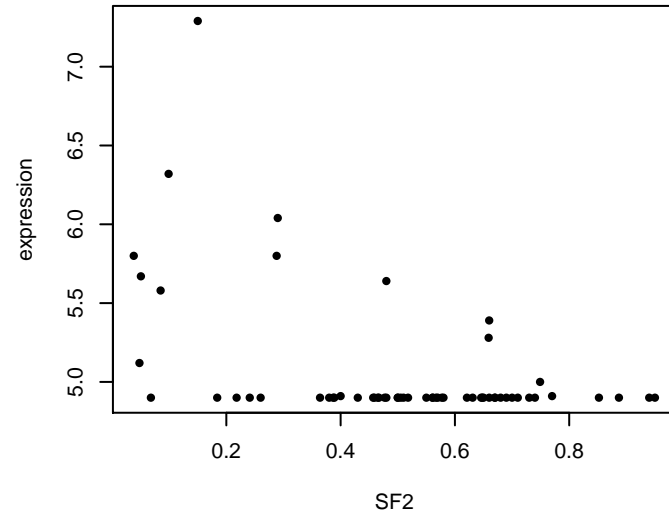**PTPRCAP : Corr = -0.459**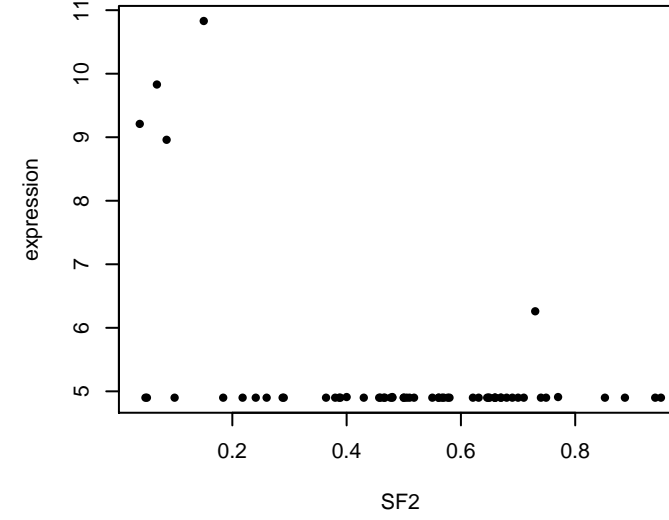**LAPTM5 : Corr = -0.442**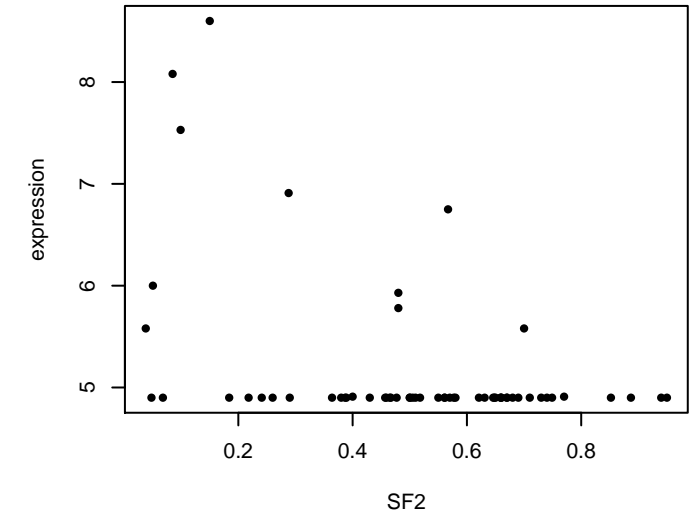**CXCR4 : Corr = -0.44**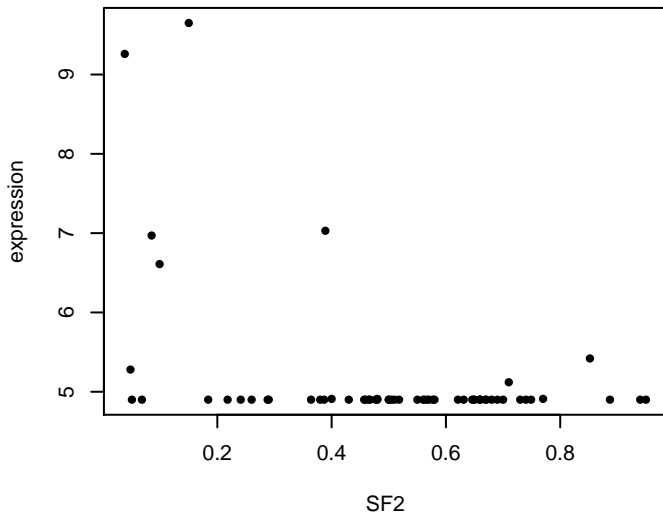**WAS : Corr = -0.423**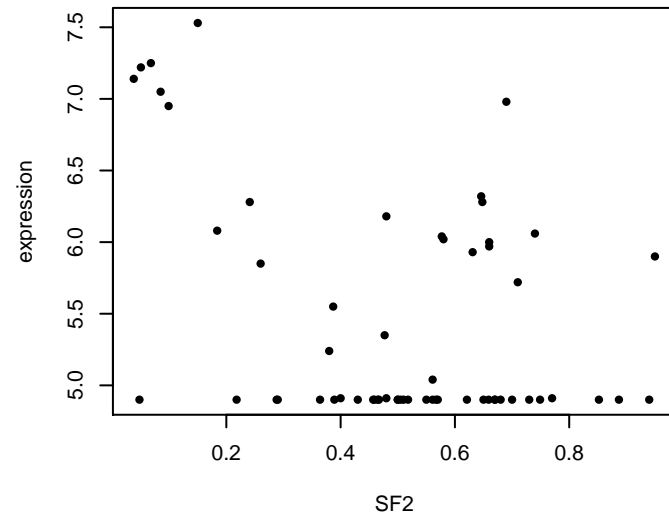**EMP2 : Corr = 0.327**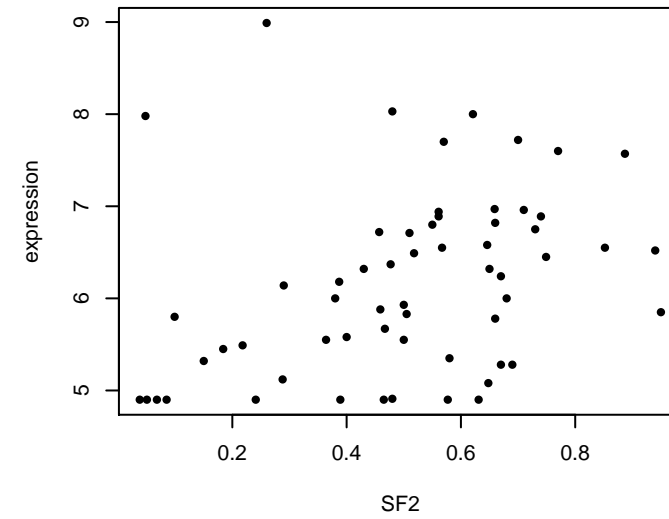**PTMS : Corr = 0.336**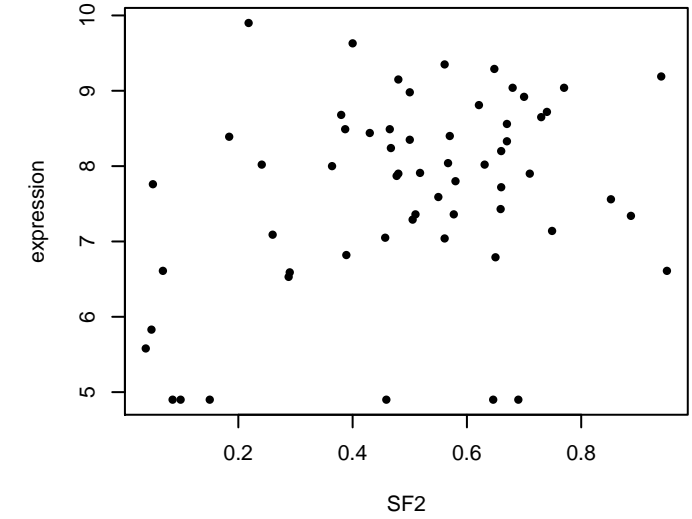

**SCRN1 : Corr = 0.371**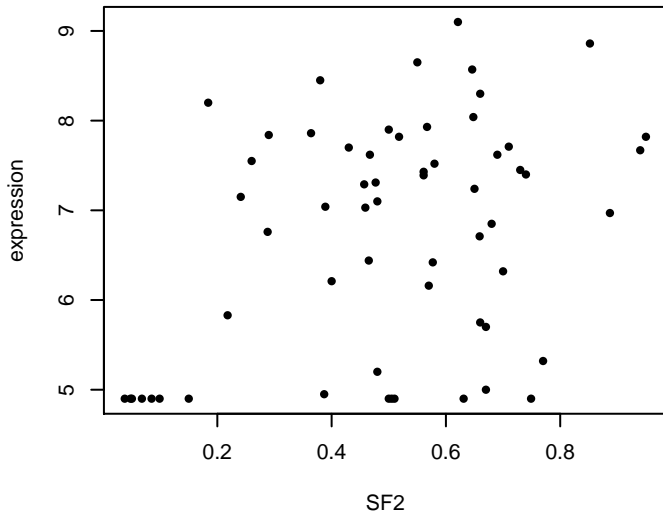**PIR : Corr = 0.375**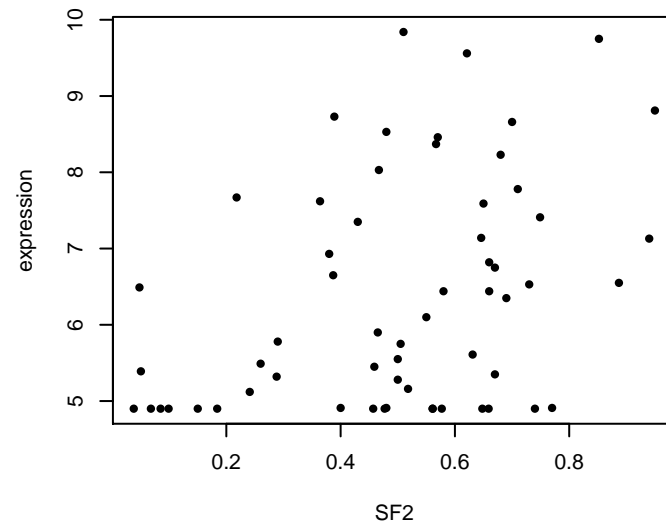**RALB : Corr = 0.383**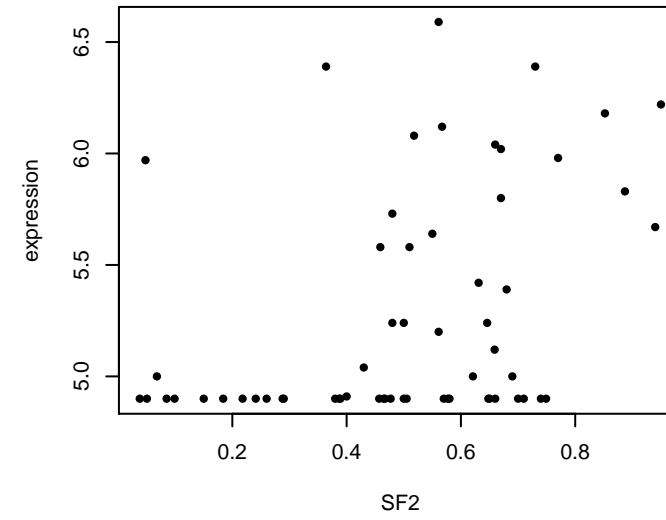**RAB13 : Corr = 0.383**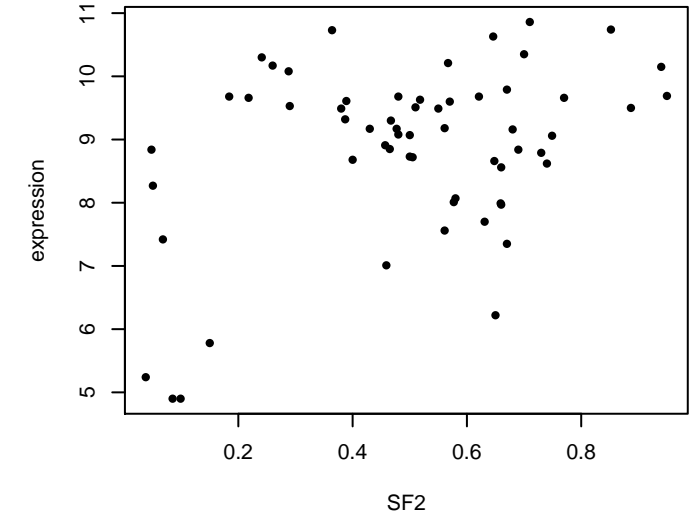**DAG1 : Corr = 0.387**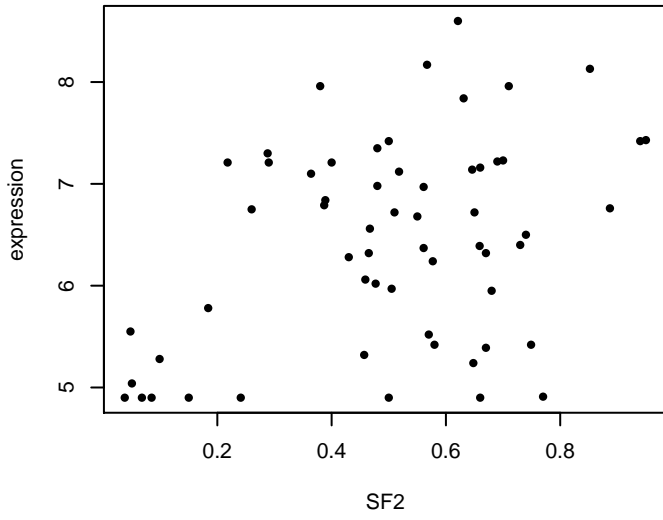**ANXA5 : Corr = 0.392**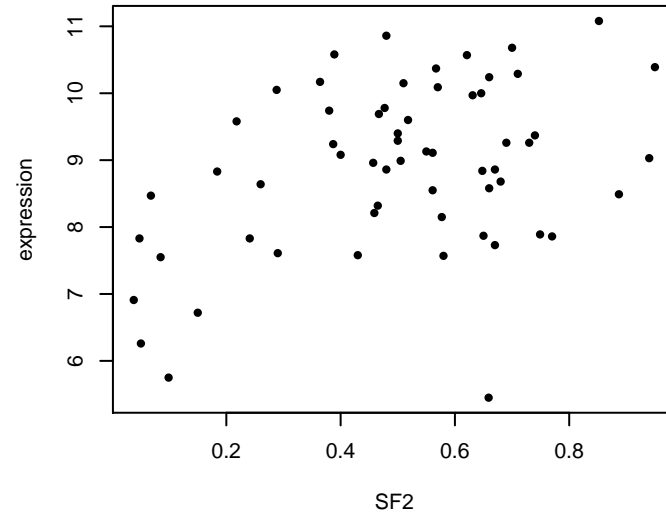**ACTN1 : Corr = 0.395**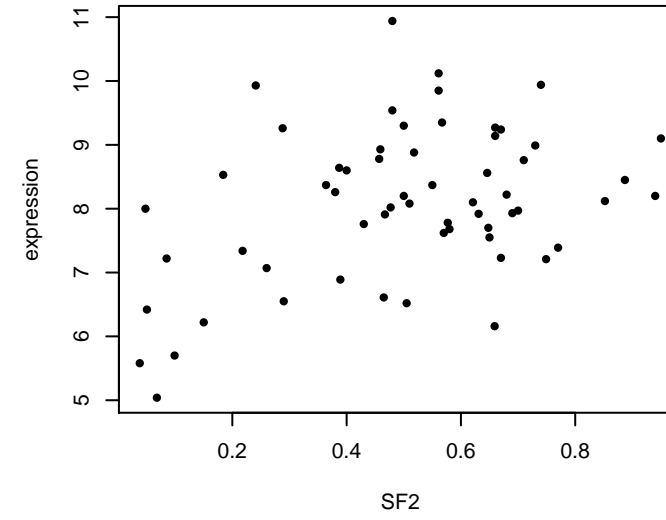**ANXA2 : Corr = 0.413**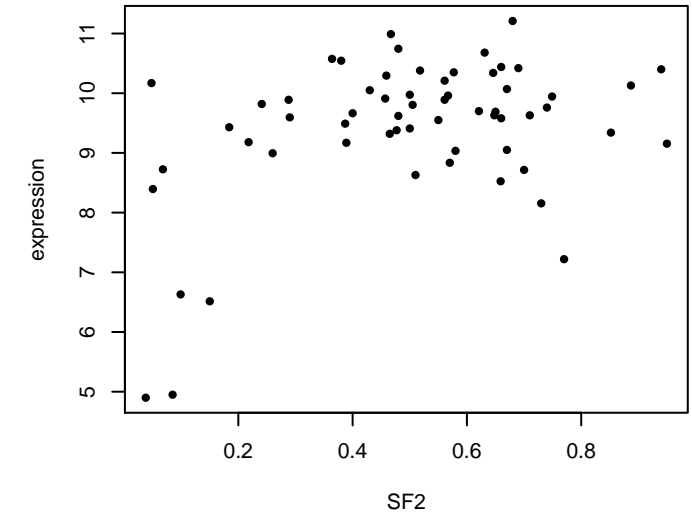**CBR1 : Corr = 0.413**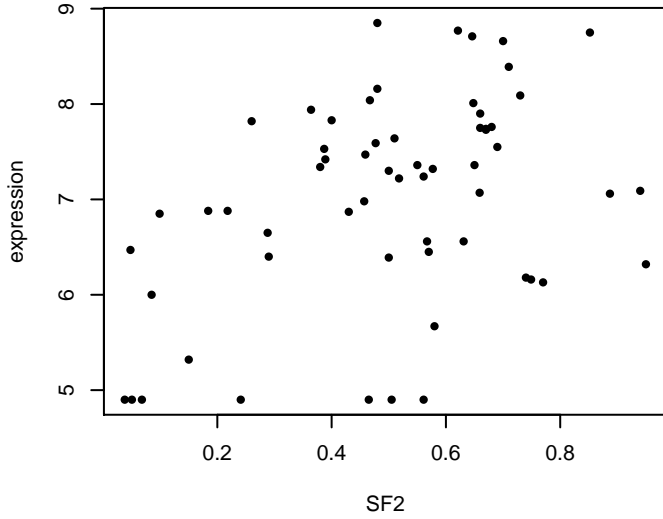**PKM2 : Corr = 0.422**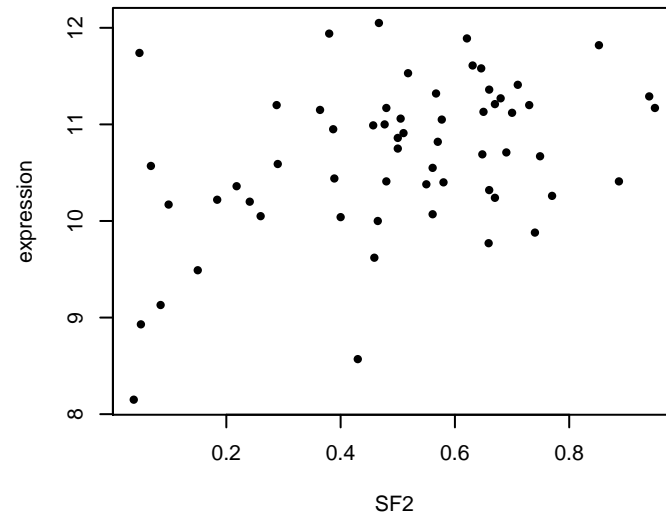**CAPNS1 : Corr = 0.437**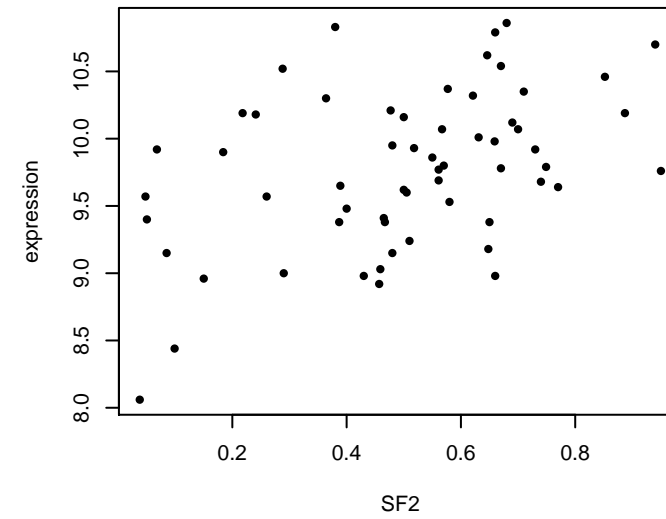**ITGB5 : Corr = 0.439**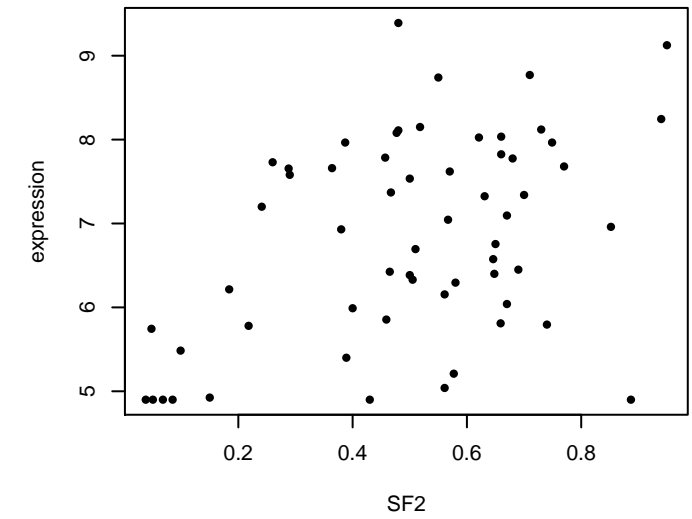

**PYGB : Corr = 0.449**

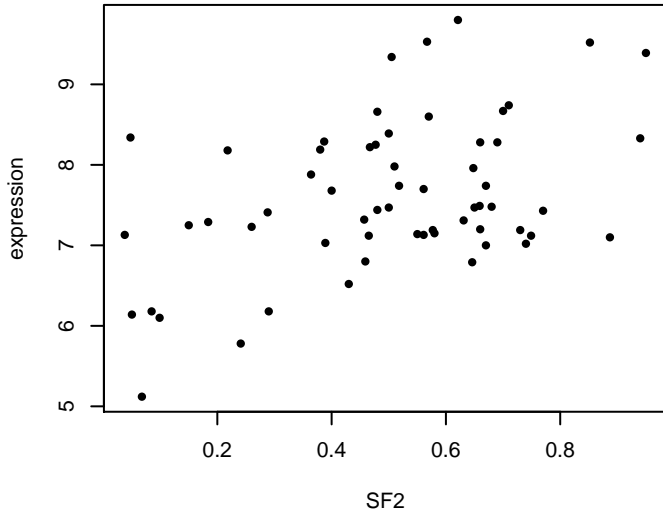

**TWF1 : Corr = 0.49**

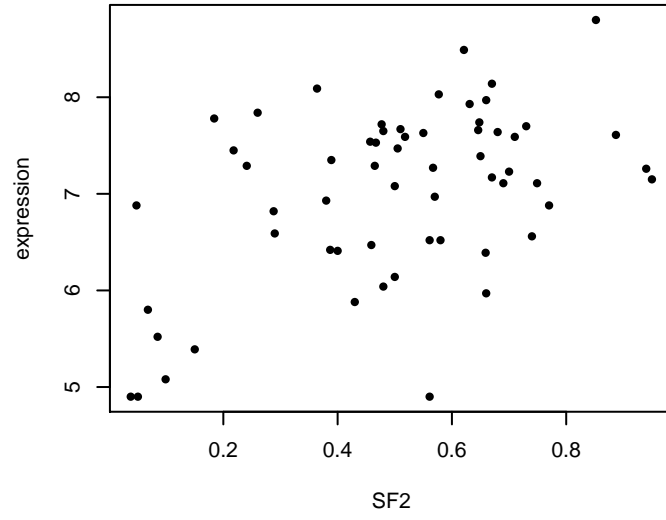

**SQSTM1 : Corr = 0.496**

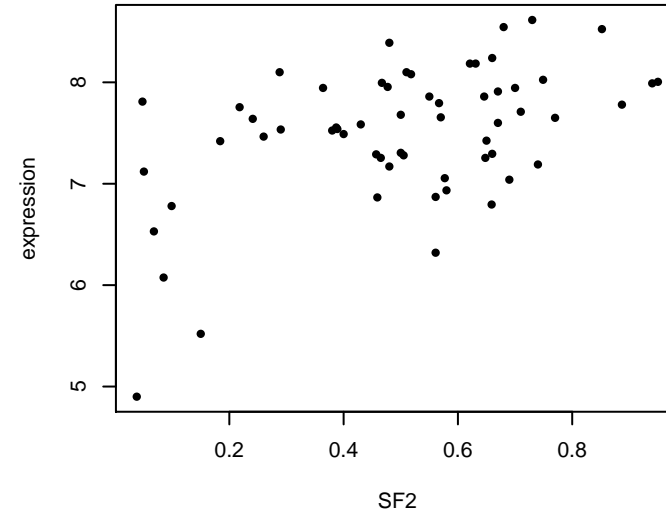

**CCND1 : Corr = 0.502**

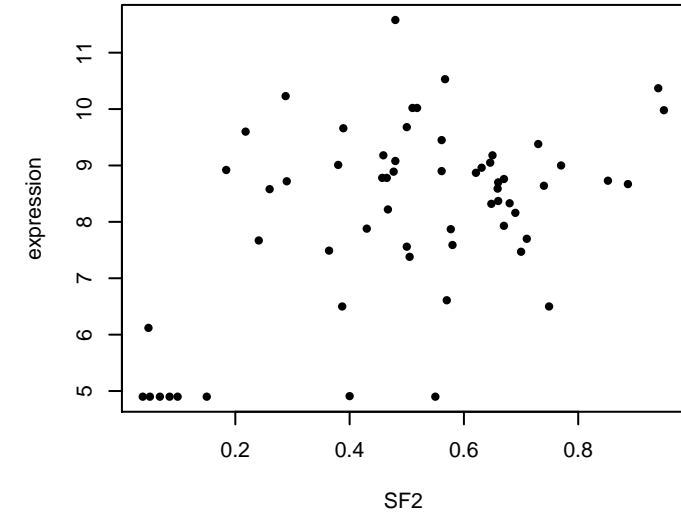

**HTRA1 : Corr = 0.512**

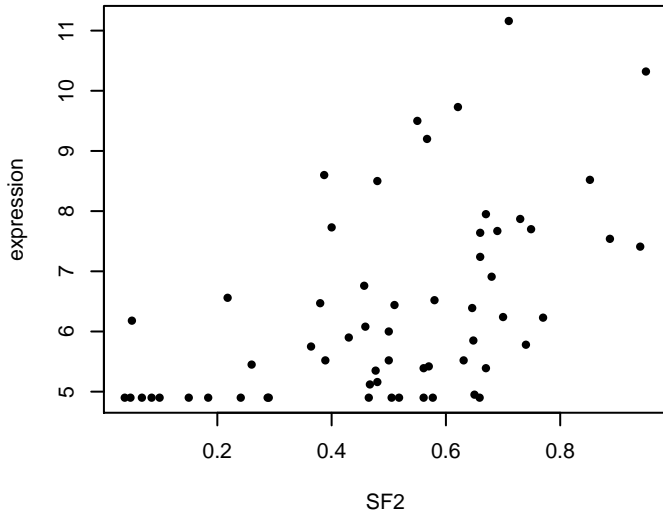

**CD63 : Corr = 0.524**

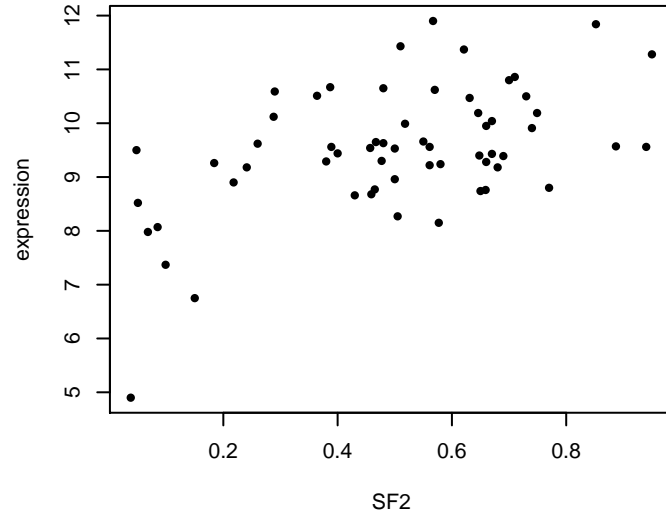

**PFN2 : Corr = 0.599**

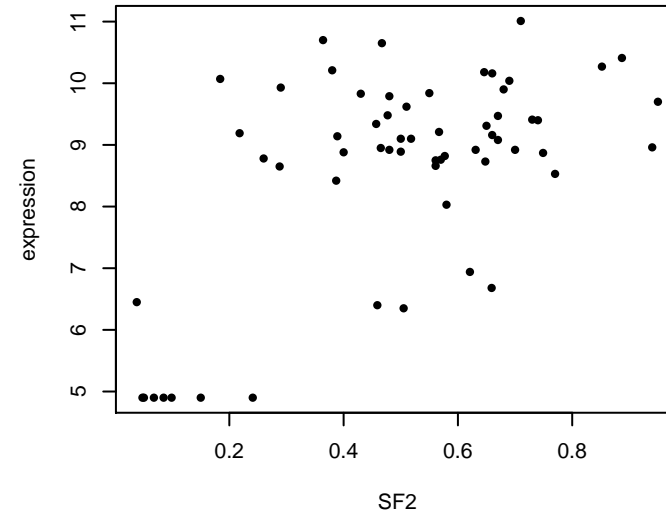

Supplement: 1471-2164-13-348-S3.pdf [file 1471-2164-13-348-S3.pdf]
