# Supplementary material for: Identification of a radiosensitivity signature using integrative metaanalysis of published microarray data for NCI-60 cancer cells
Source: PubMed Central journal article supplement (PMC3472294; doi:10.1186/1471-2164-13-348), 2012-07-30

**MYB : Corr = -0.585**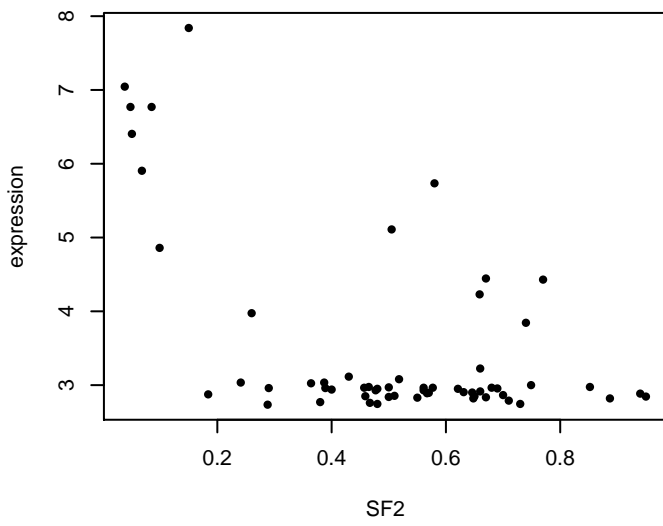**HCLS1 : Corr = -0.571**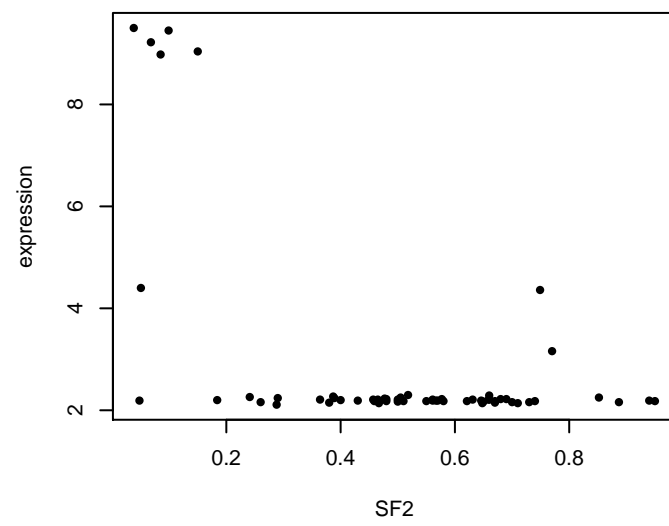**LAPTM5 : Corr = -0.56**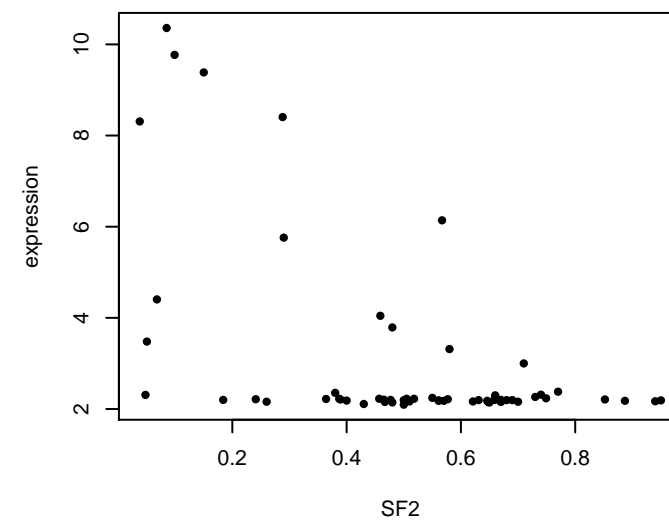**PTPRC : Corr = -0.555**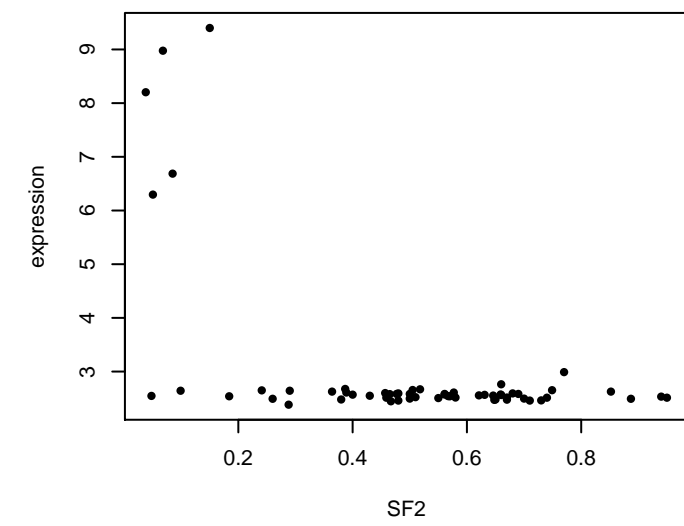**WAS : Corr = -0.549**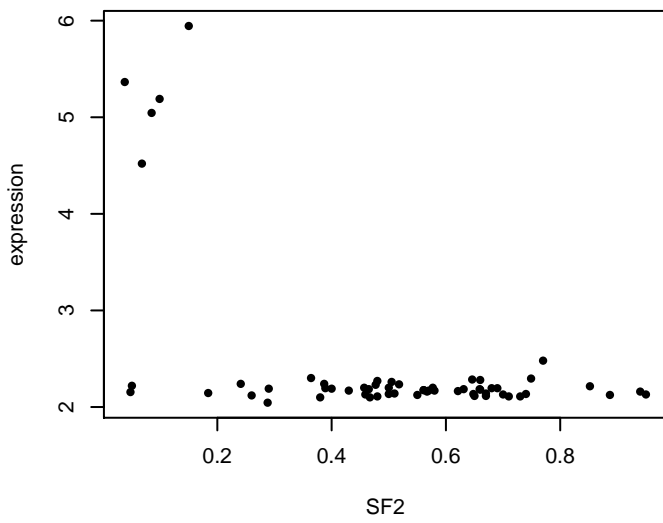**ARHGDI3 : Corr = -0.521**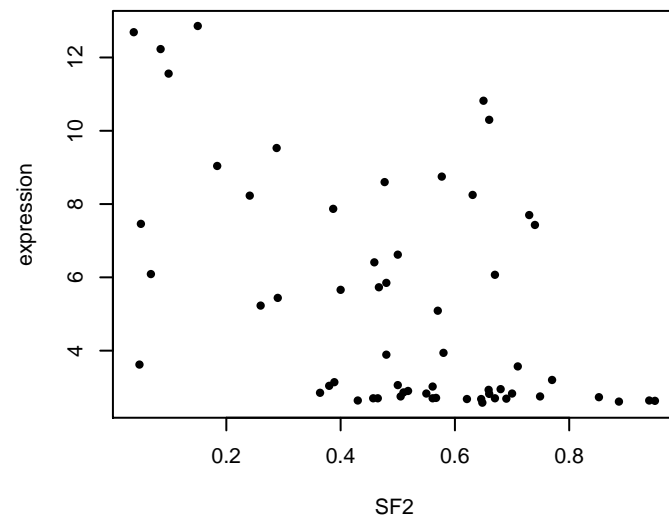**PTPRCAP : Corr = -0.499**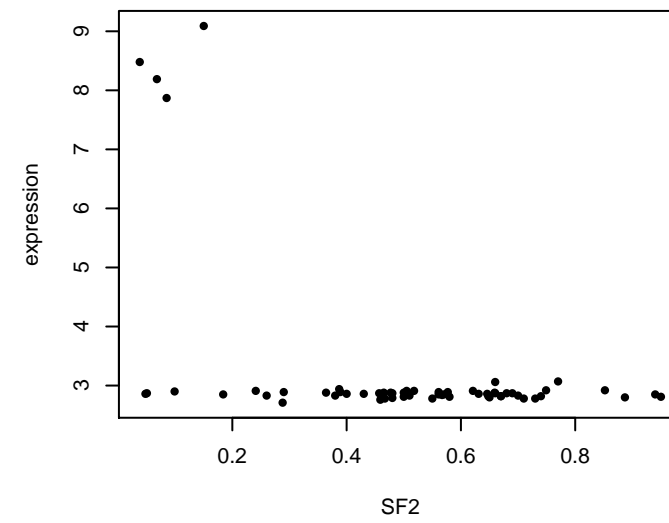**LRMP : Corr = -0.499**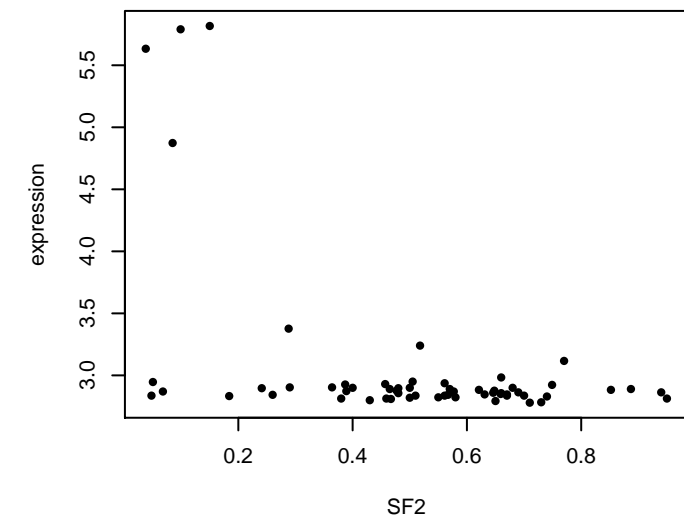**CORO1A : Corr = -0.488**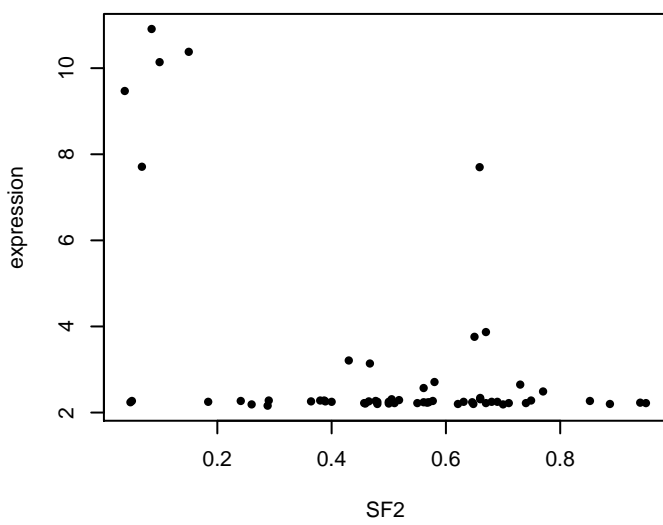**CXCR4 : Corr = -0.474**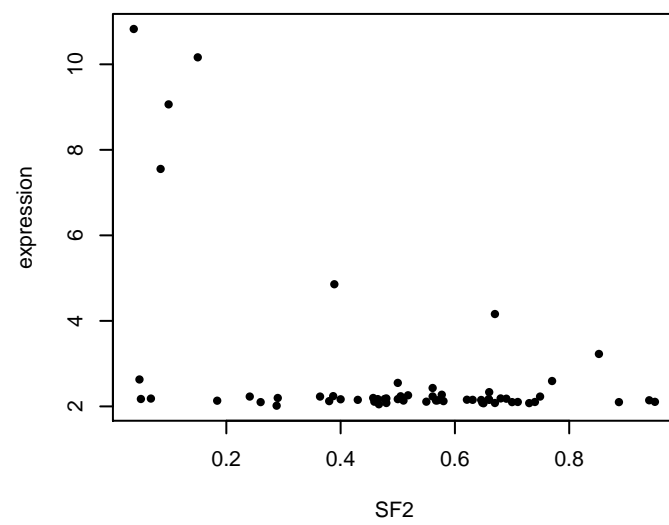**RALB : Corr = 0.348**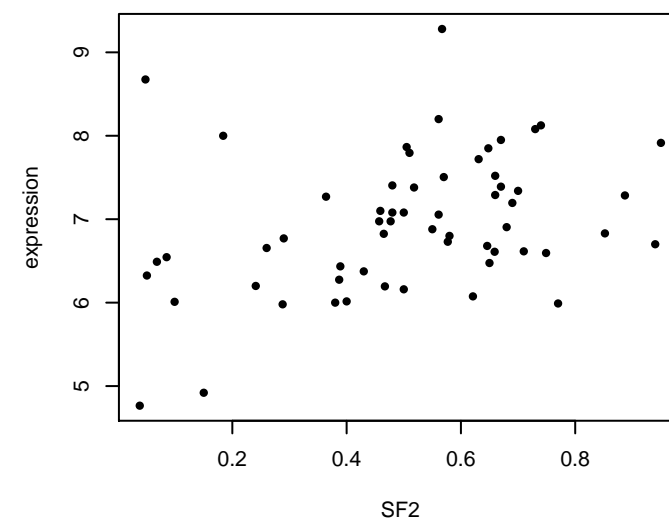**TWF1 : Corr = 0.38**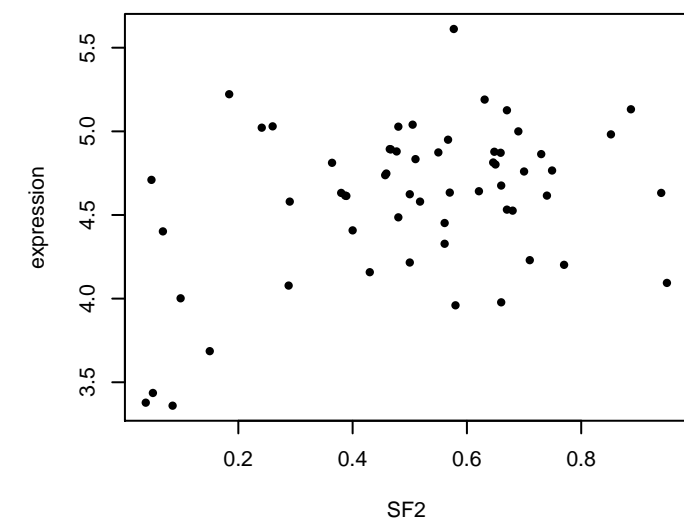

**CBR1 : Corr = 0.39**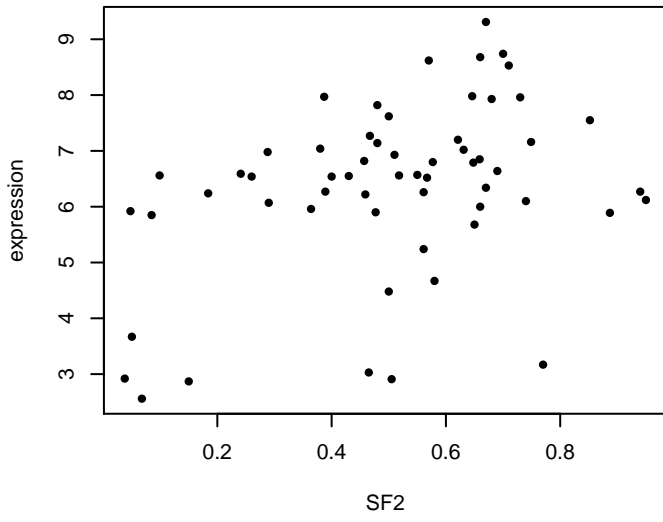**ITGB5 : Corr = 0.394**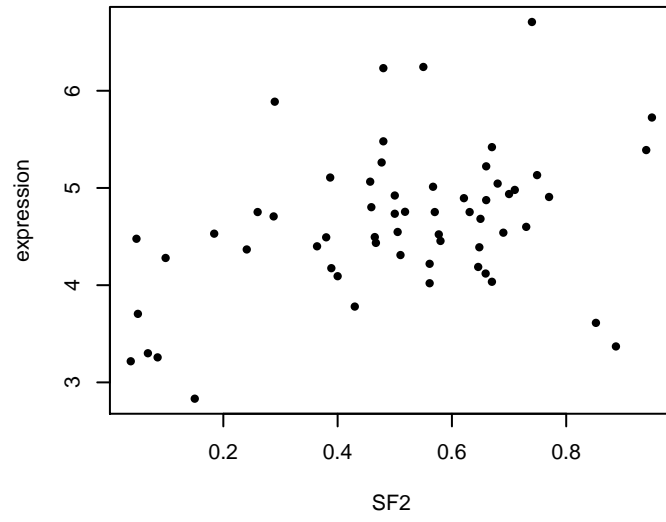**ACTN1 : Corr = 0.395**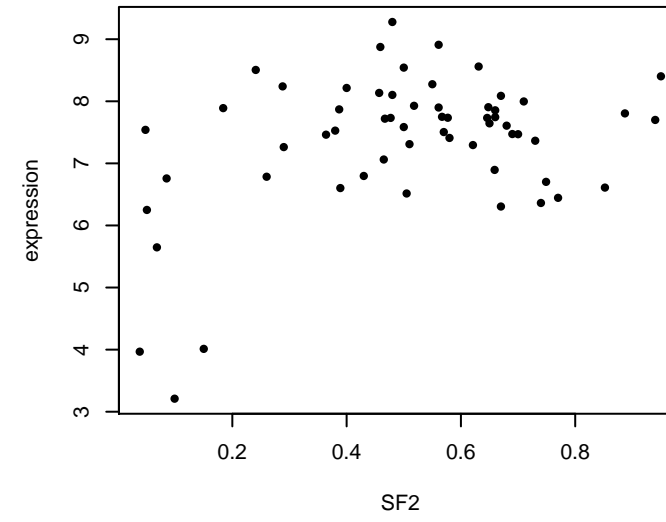**EMP2 : Corr = 0.397**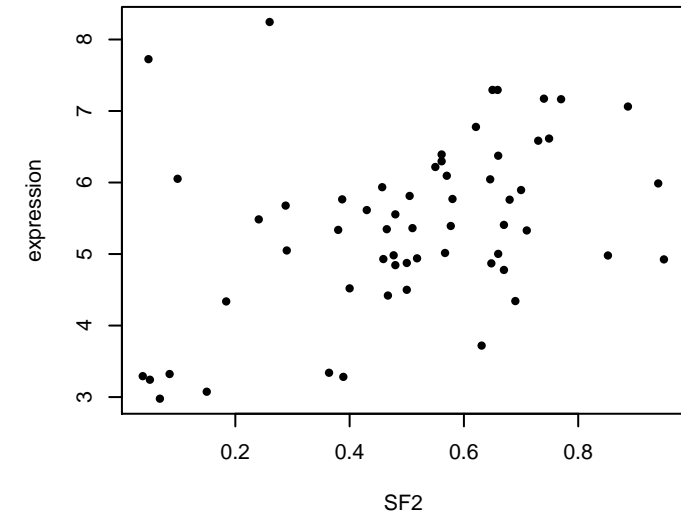**PYGB : Corr = 0.398**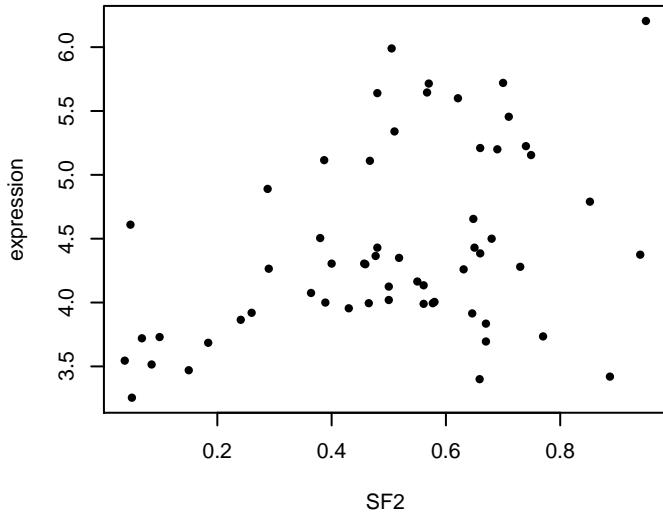**PKM2 : Corr = 0.4**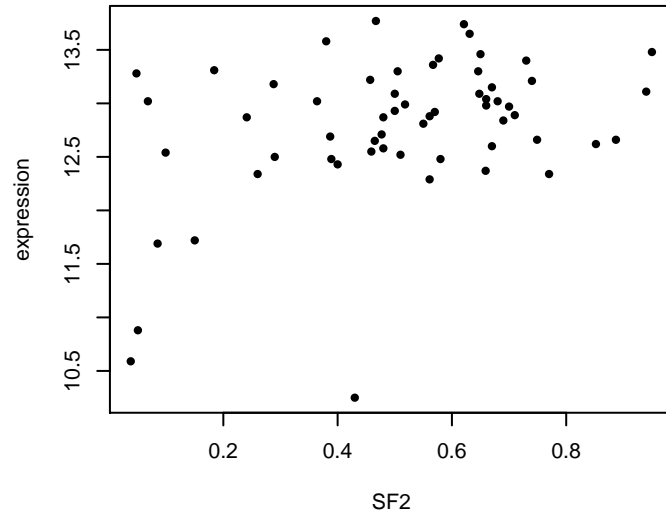**PTMS : Corr = 0.41**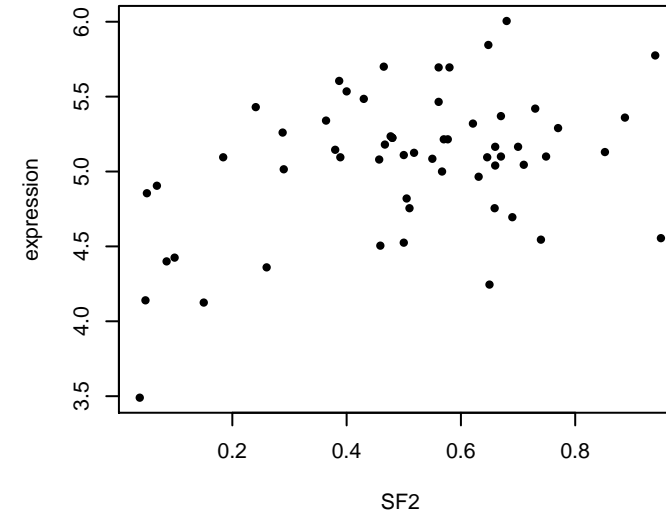**ANXA5 : Corr = 0.417**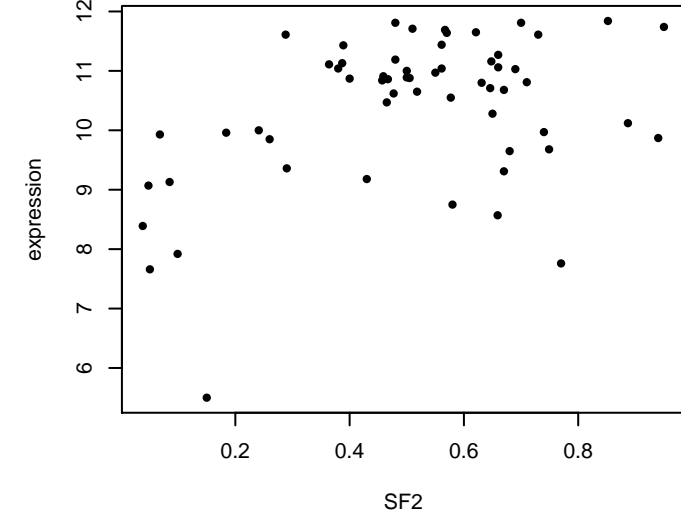**ANXA2 : Corr = 0.418**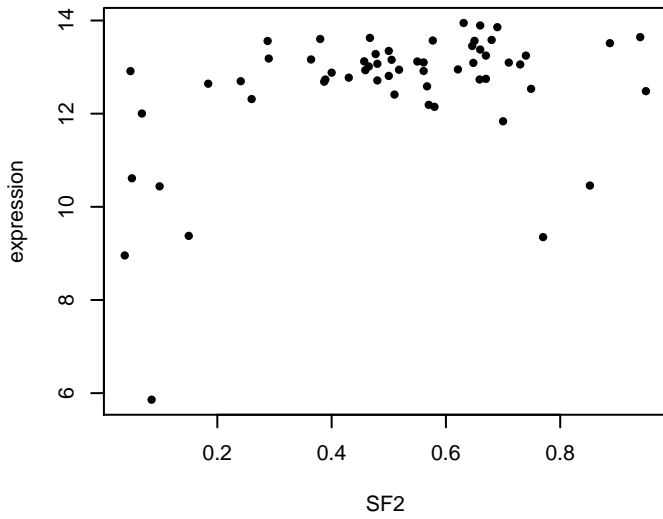**CAPNS1 : Corr = 0.426**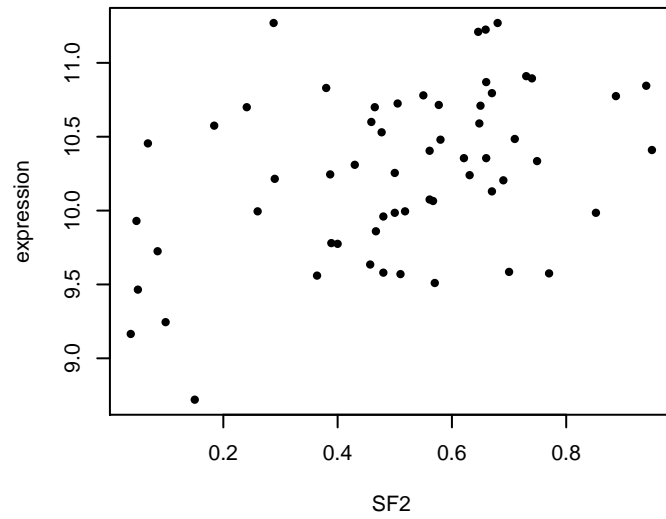**SCRN1 : Corr = 0.428**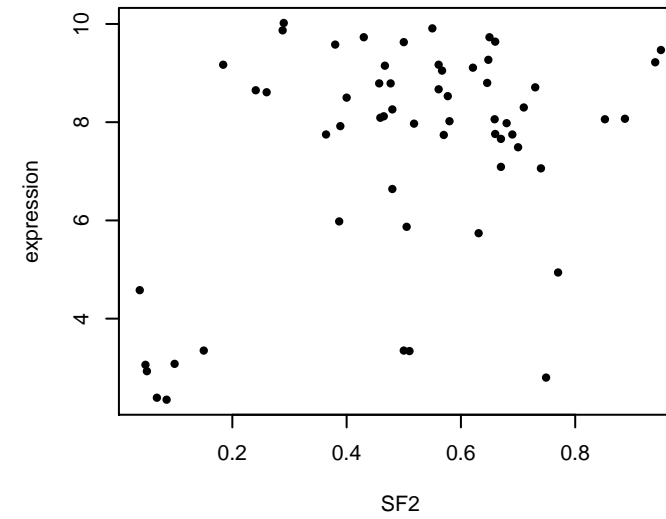**PIR : Corr = 0.447**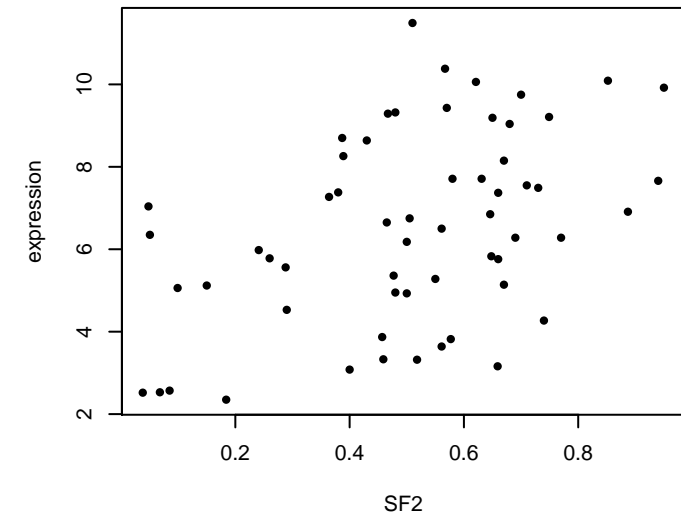

**SQSTM1 : Corr = 0.457**

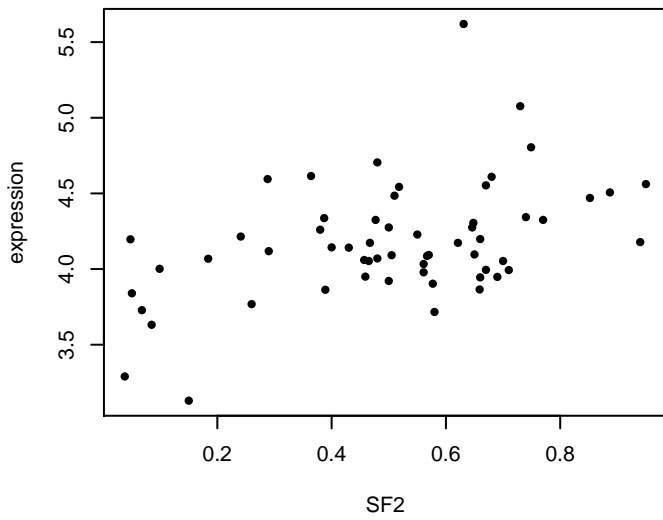

**HTRA1 : Corr = 0.478**

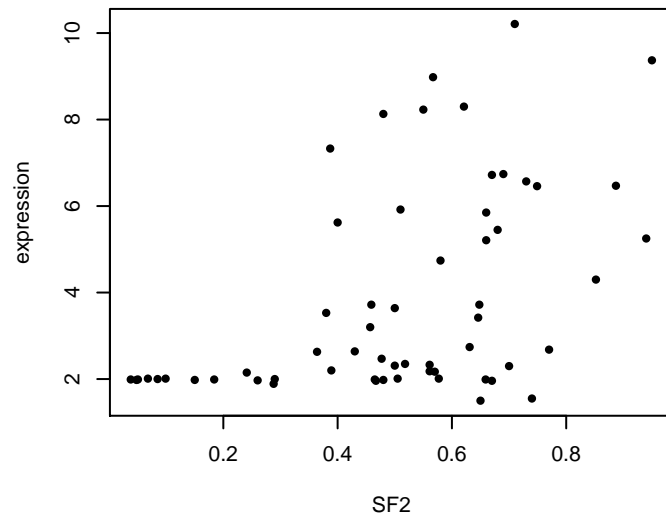

**RAB13 : Corr = 0.481**

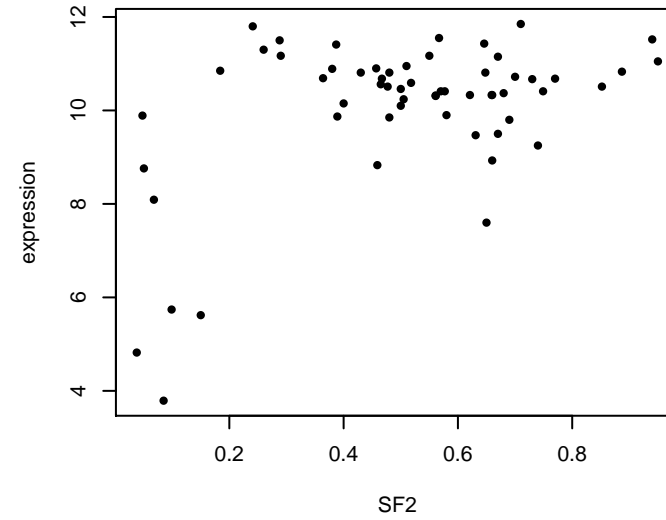

**CD63 : Corr = 0.504**

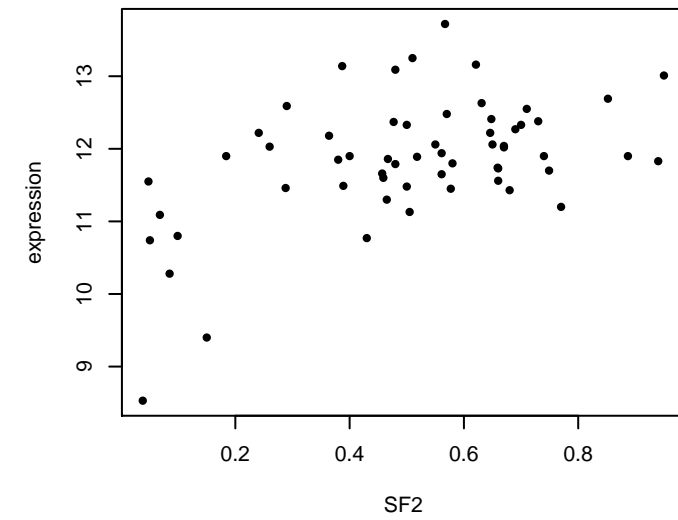

**DAG1 : Corr = 0.508**

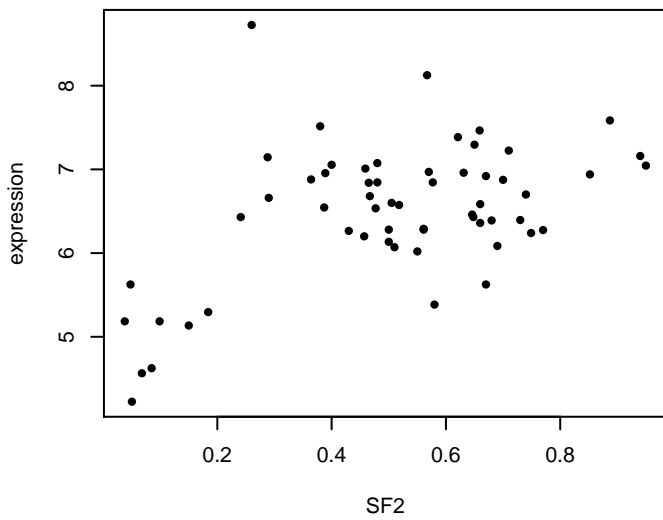

**CCND1 : Corr = 0.538**

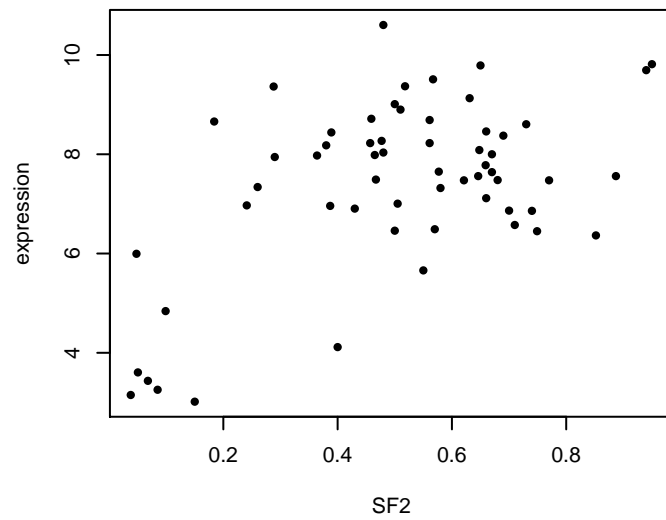

**PFN2 : Corr = 0.659**

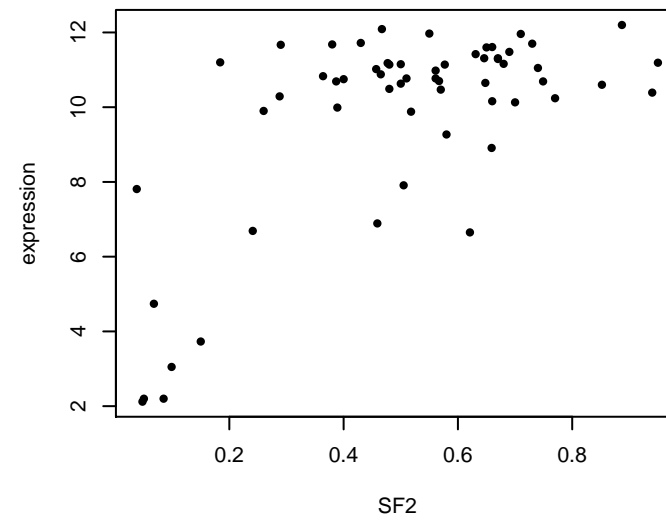

Supplement: 1471-2164-13-348-S4.pdf [file 1471-2164-13-348-S4.pdf]
