# Supplementary material for: Identification of a radiosensitivity signature using integrative metaanalysis of published microarray data for NCI-60 cancer cells
Source: PubMed Central journal article supplement (PMC3472294; doi:10.1186/1471-2164-13-348), 2012-07-30

**MYB : Corr = -0.593**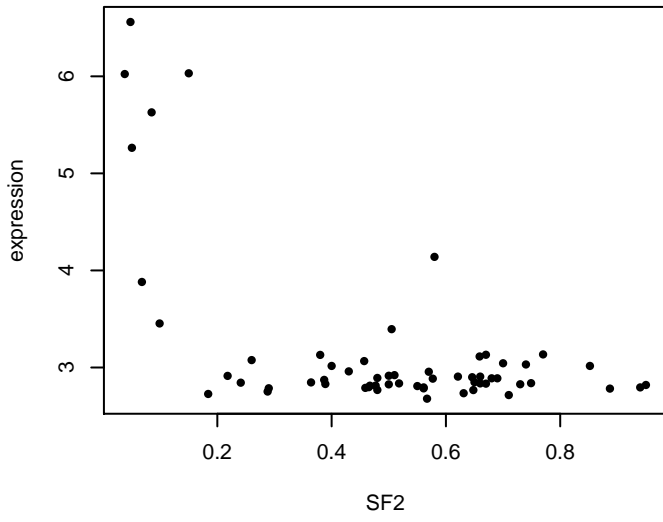**HCLS1 : Corr = -0.576**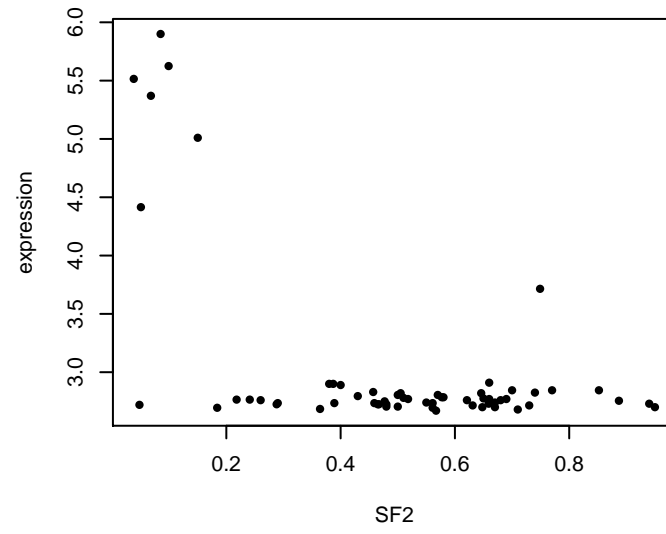**WAS : Corr = -0.572**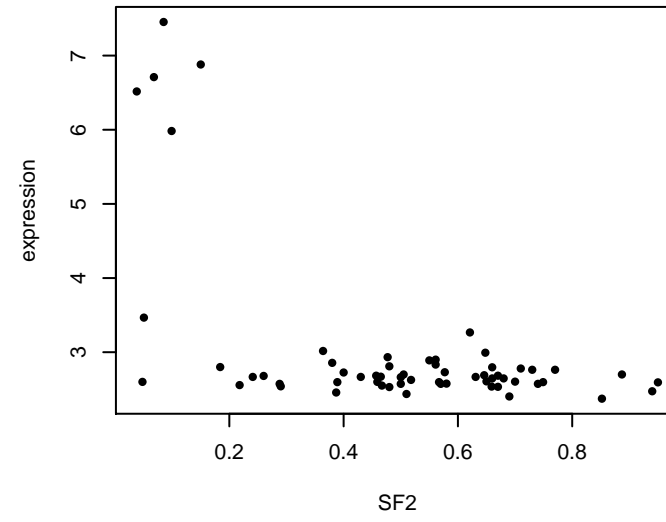**PTPRC : Corr = -0.543**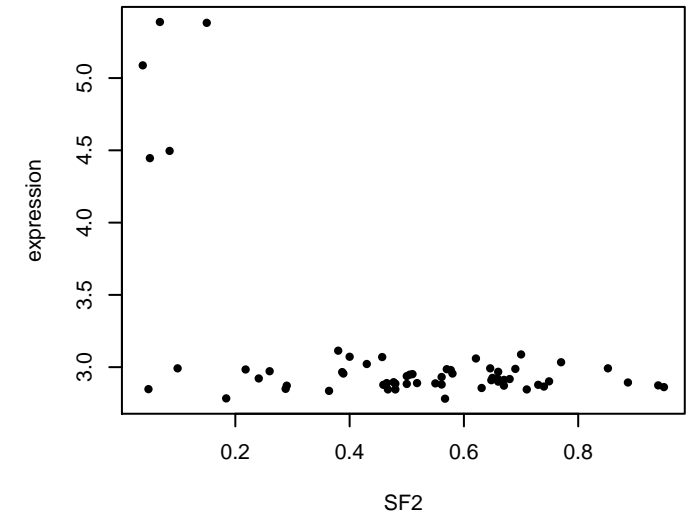**LAPTM5 : Corr = -0.498**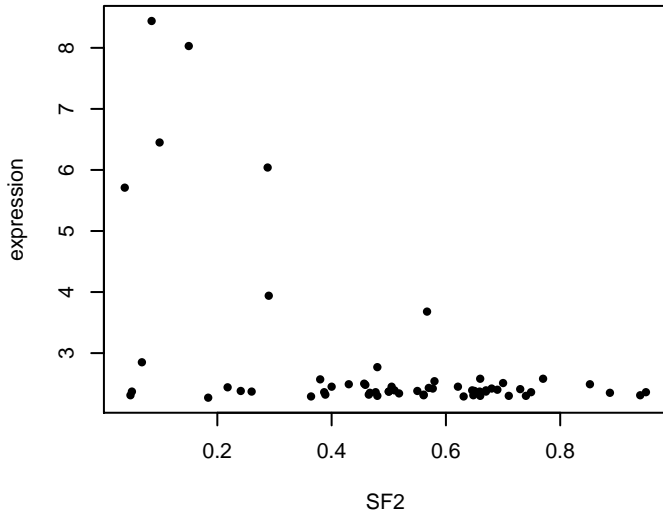**ARHGDI3 : Corr = -0.487**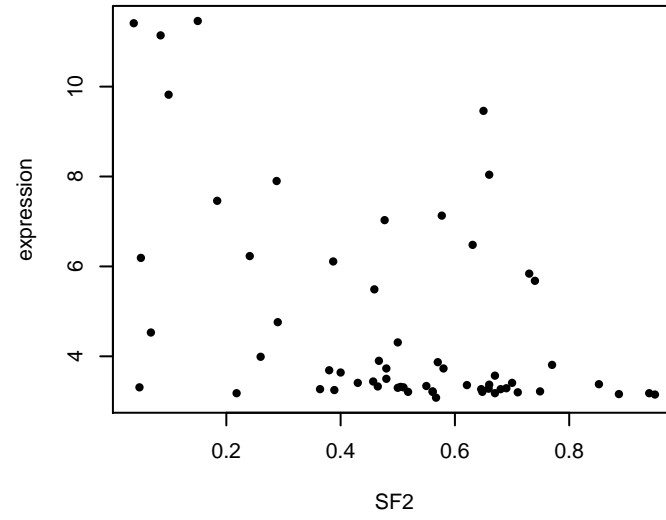**PTPRCAP : Corr = -0.486**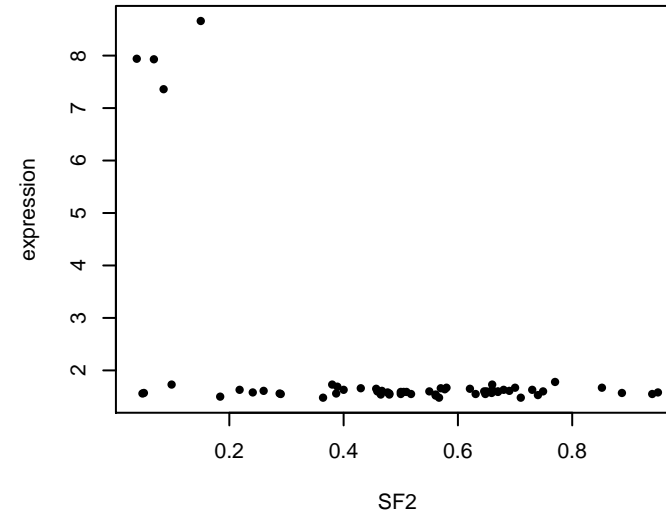**LRMP : Corr = -0.473**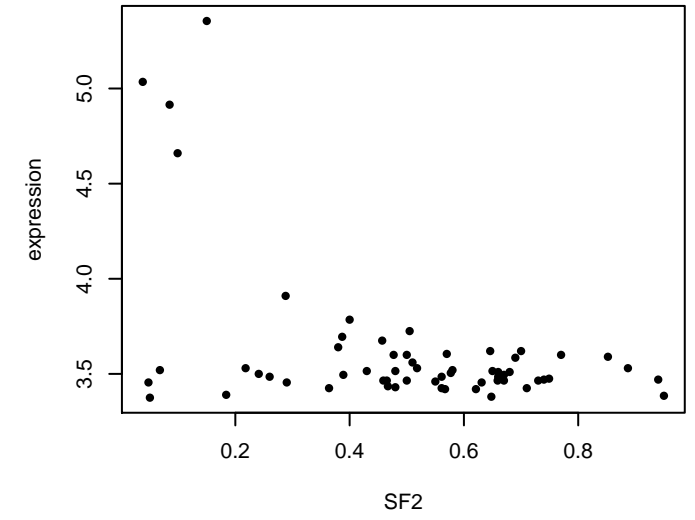**CORO1A : Corr = -0.464**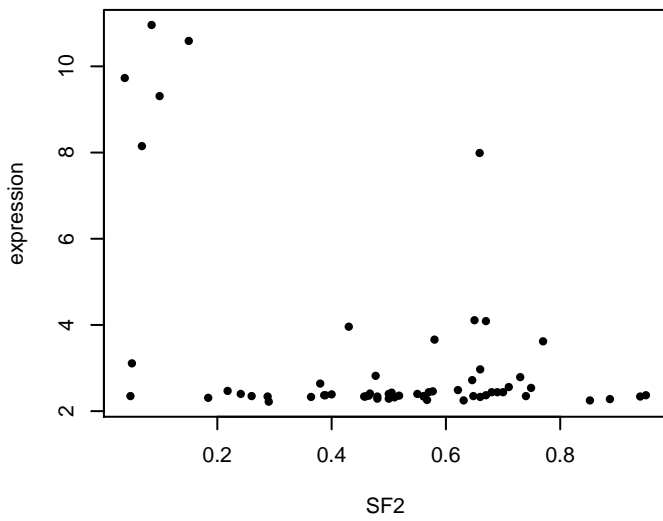**CXCR4 : Corr = -0.459**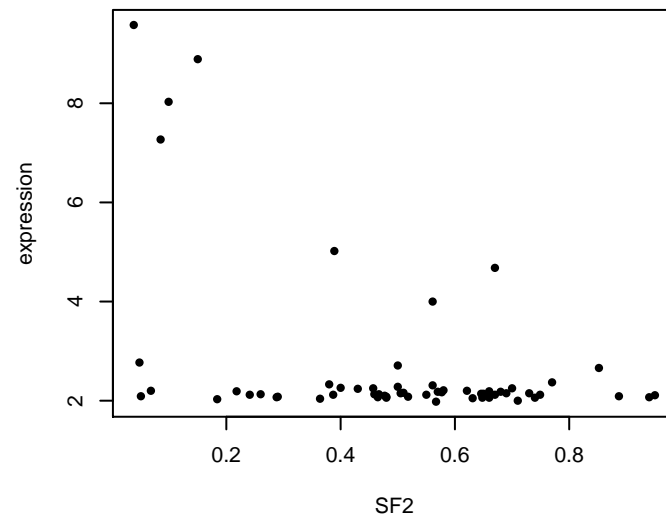**ANXA2 : Corr = 0.339**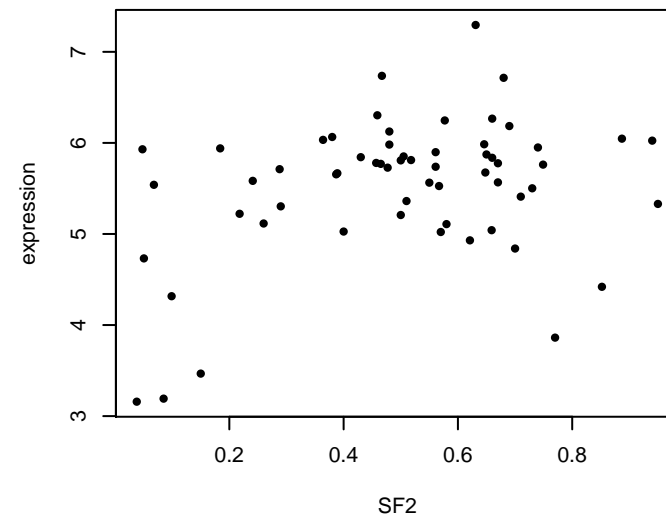**EMP2 : Corr = 0.372**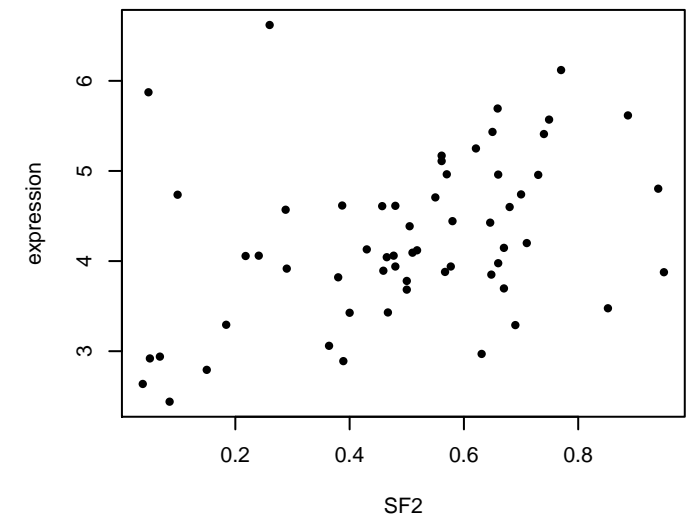

**PYGB : Corr = 0.396**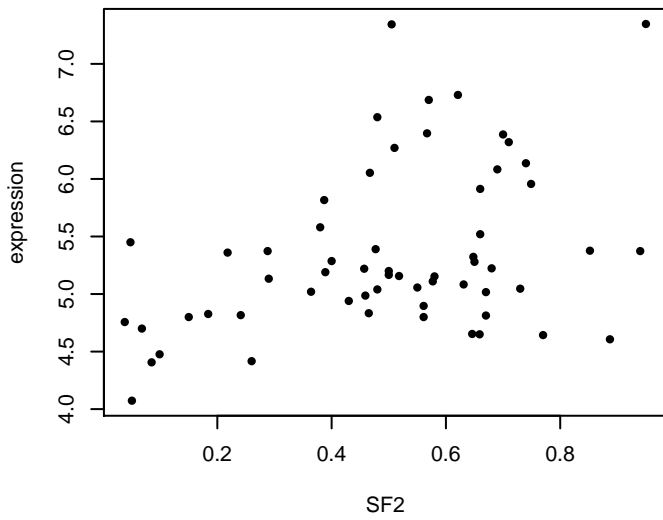**SCRN1 : Corr = 0.401**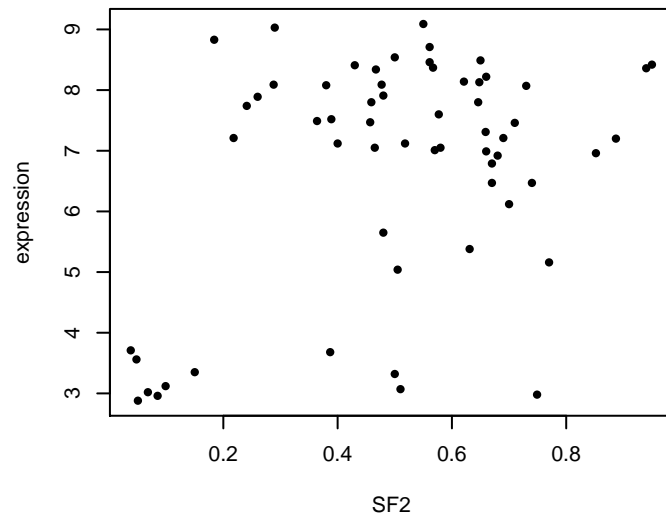**RALB : Corr = 0.403**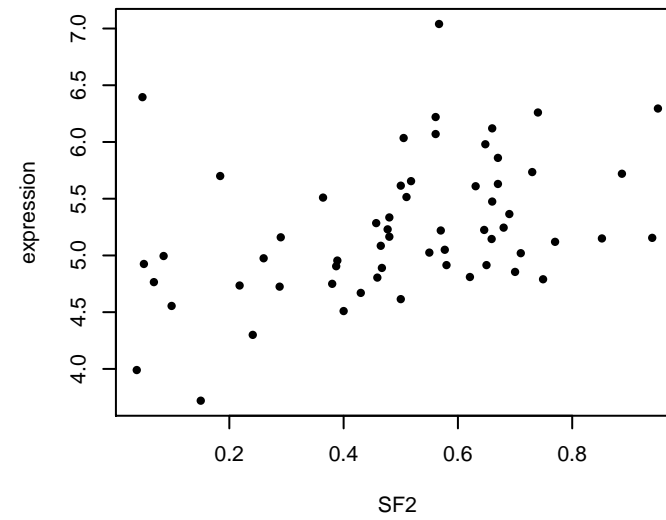**ACTN1 : Corr = 0.409**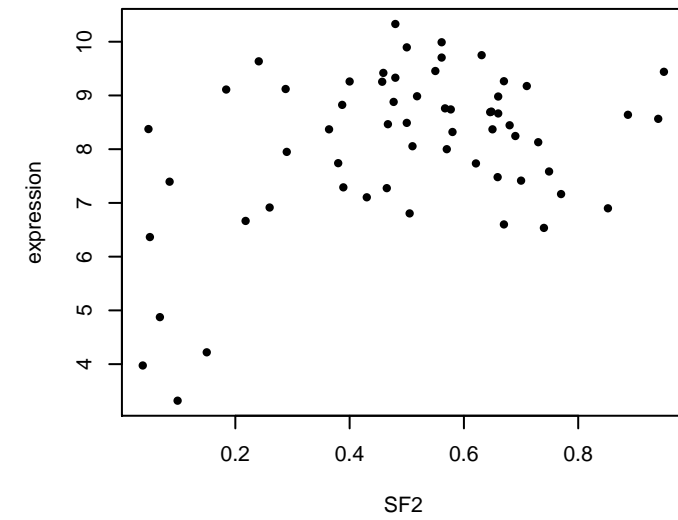**CBR1 : Corr = 0.413**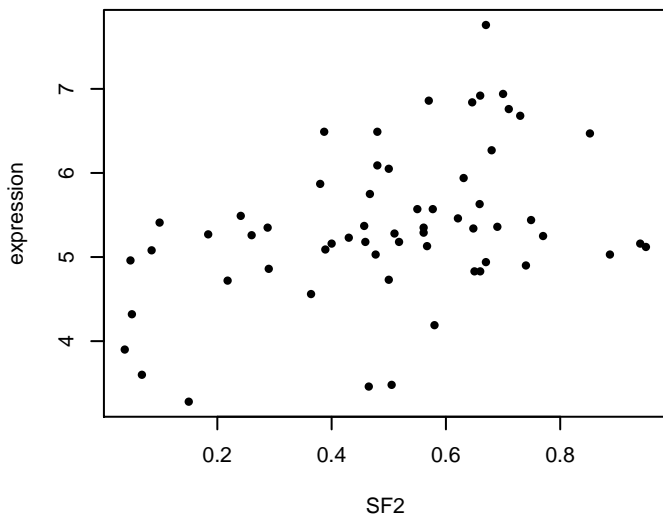**TWF1 : Corr = 0.422**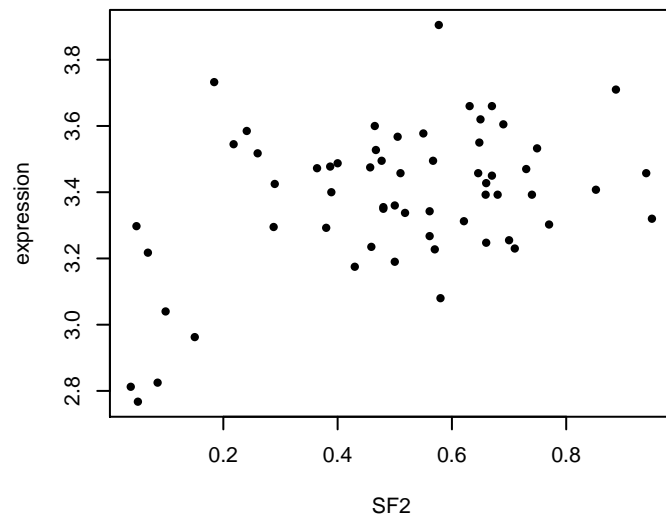**ANXA5 : Corr = 0.422**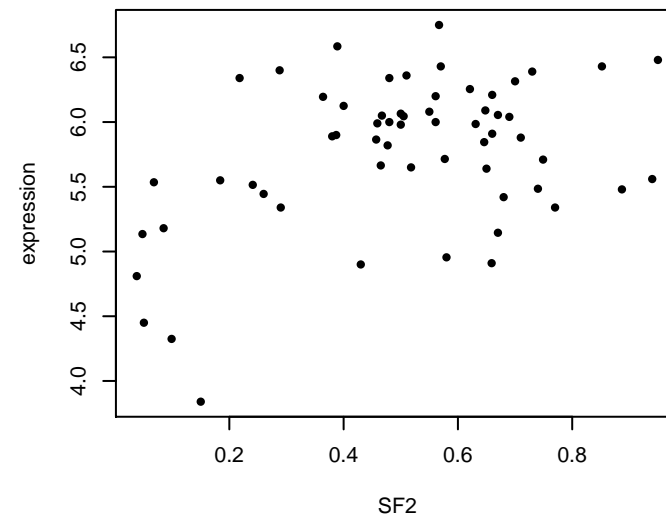**RAB13 : Corr = 0.423**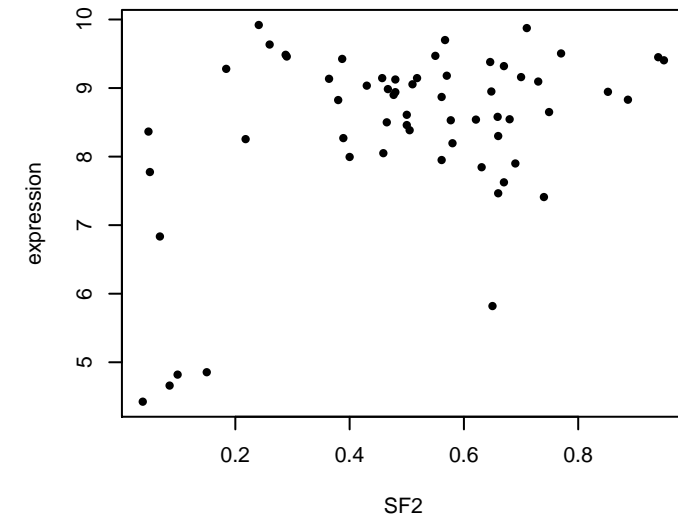**PIR : Corr = 0.432**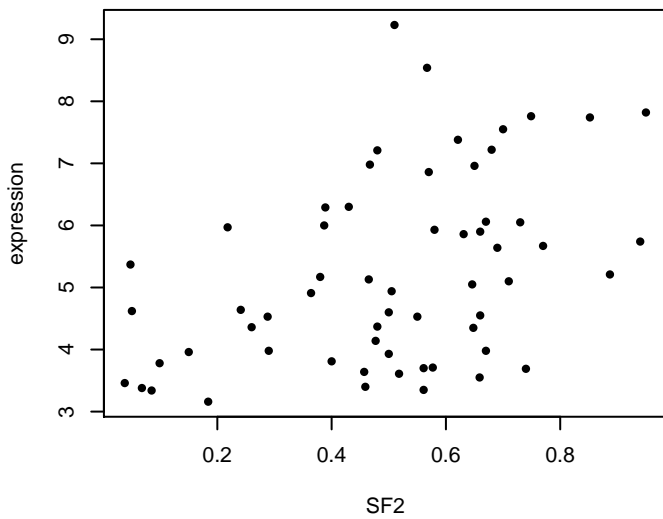**PKM2 : Corr = 0.446**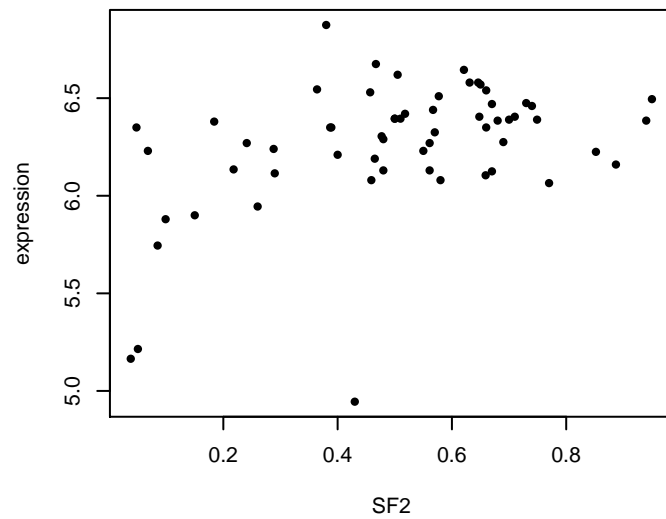**ITGB5 : Corr = 0.462**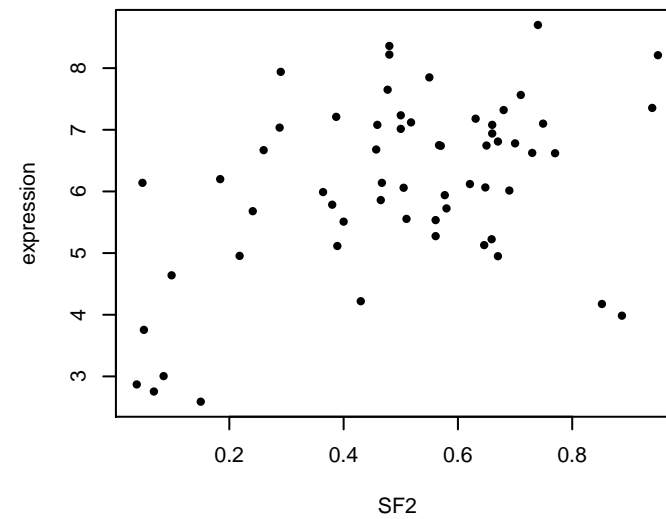**PTMS : Corr = 0.476**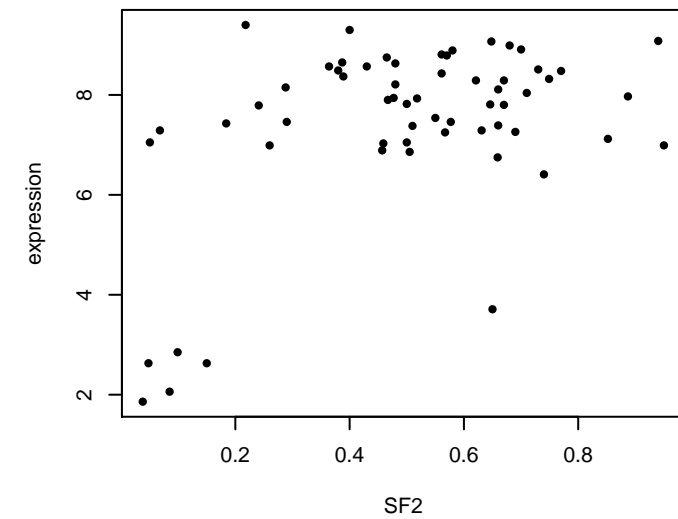

**CAPNS1 : Corr = 0.482**

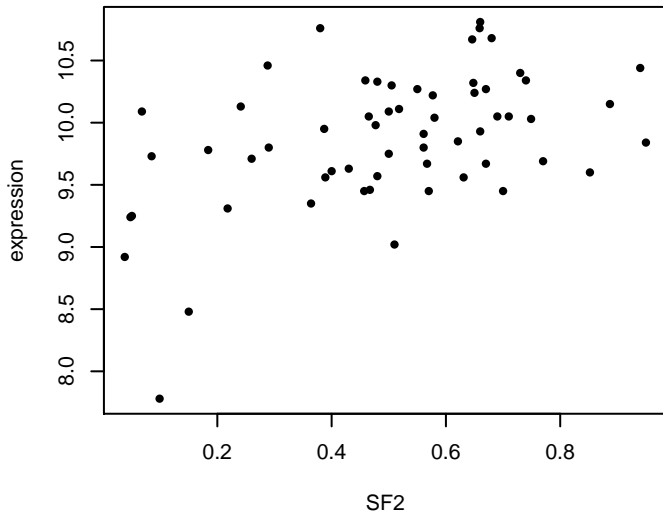

**SQSTM1 : Corr = 0.483**

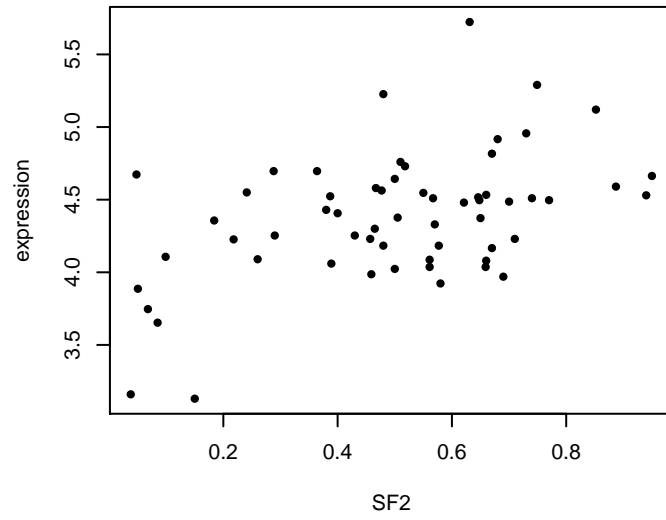

**CCND1 : Corr = 0.499**

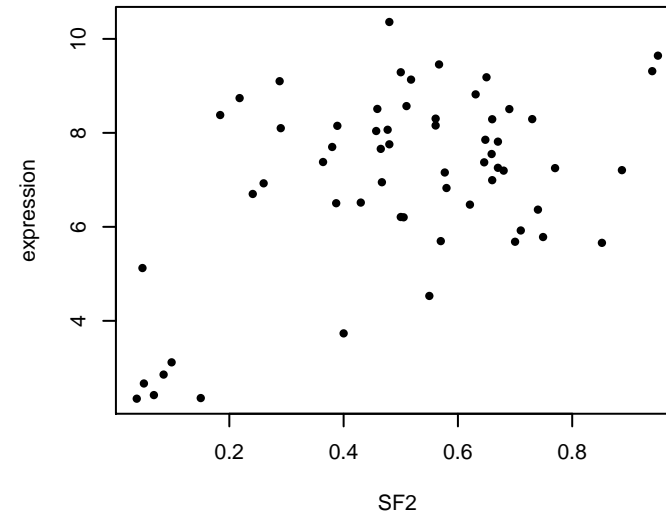

**CD63 : Corr = 0.509**

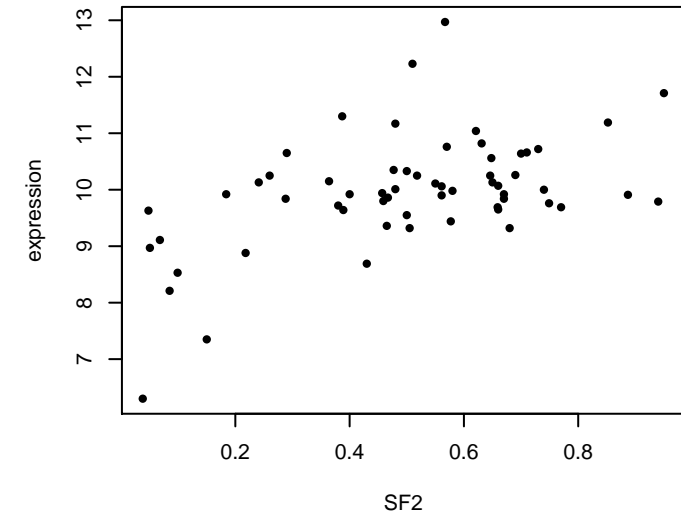

**HTRA1 : Corr = 0.517**

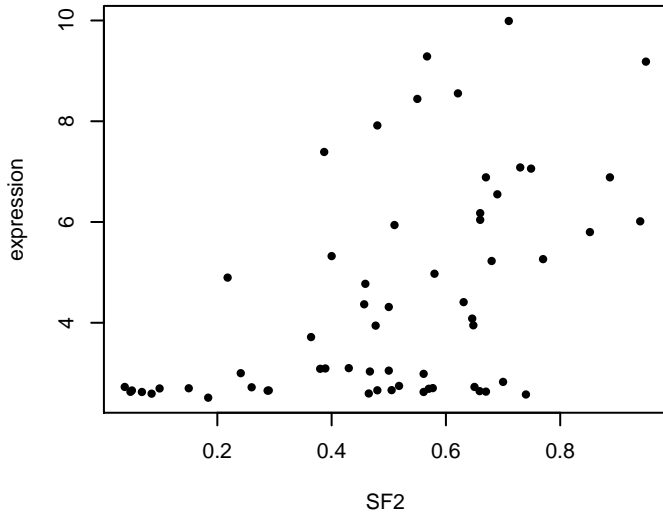

**DAG1 : Corr = 0.603**

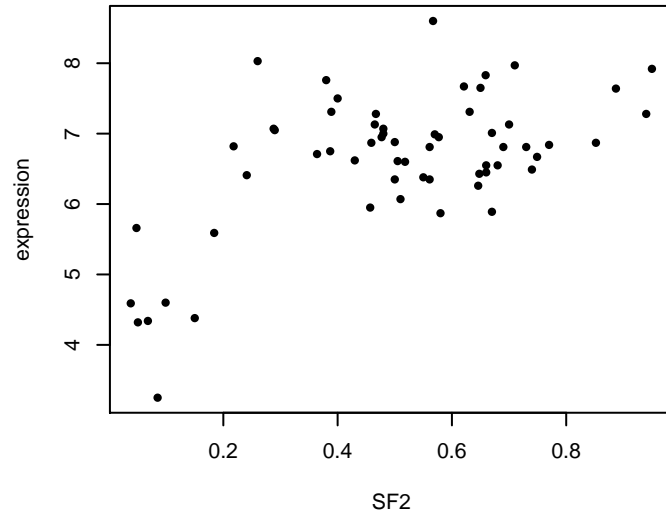

**PFN2 : Corr = 0.614**

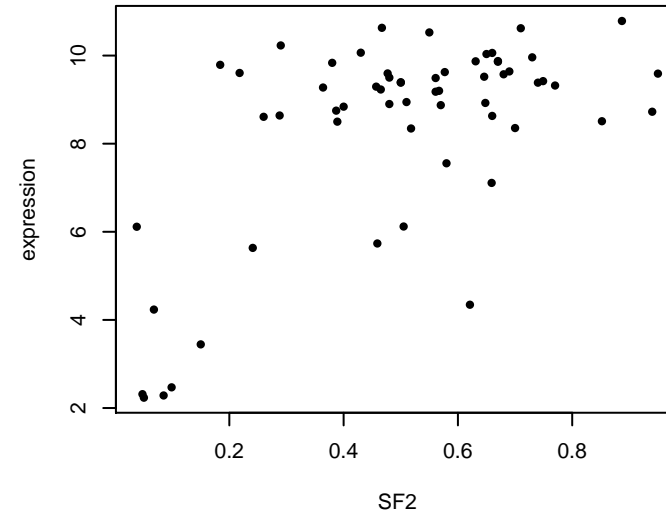

Supplement: 1471-2164-13-348-S5.pdf [file 1471-2164-13-348-S5.pdf]
